# Supplementary material for: An integrated chemical, mass spectrometric and computational strategy for (quantitative) phosphoproteomics: application to Drosophila melanogaster Kc167 cells
Source: Royal Society of Chemistry journal article supplement (doi:10.1039/b617545g), 2007-02-19
Supplement: b617545g-table.pdf [file b617545g-table.pdf]

## Supplementary table 1

| Protein           | Sequence            | P-value | Xcorr | dCn   |
|-------------------|---------------------|---------|-------|-------|
| RIR2_DROME        | FSLKS*PSKK          | 0.9917  | 2.039 | 0.291 |
| UPTR:Q9W3R9_DROME | KRS*PISIEIK         | 1       | 2.649 | 0.3   |
| UPTR:Q9W3R9_DROME | KRSPIS*IEIK         | 0.9655  | 2.039 | 0.082 |
| UPTR:Q8MYV4_DROME | ASS*GDEKEPFAK       | 0.9807  | 2.61  | 0.142 |
| UPTR:Q5UHE2_DROME | AAS*PEPMK           | 0.9395  | 1.794 | 0.155 |
| UPTR:Q9VAY1_DROME | RVS*PVPAK           | 0.9962  | 2.231 | 0.193 |
| UPTR:Q7KJV6_DROME | LSVQS*PPK           | 0.994   | 2.174 | 0.241 |
| UPTR:Q8T3Q6_DROME | KLS*PQPPVDDKK       | 0.9943  | 2.093 | 0.262 |
| HP1_DROME         | RKS*EEPTAPSGNK      | 0.9805  | 2.374 | 0.169 |
| UPTR:Q9VLK2_DROME | LSPAS*PPK           | 0.9783  | 1.589 | 0.296 |
| UPTR:Q6AWF3_DROME | RGS*ESGSTADAHLR     | 0.9184  | 2.806 | 0.067 |
| UPTR:Q6AWQ1_DROME | KRES*PIGR           | 0.995   | 1.753 | 0.275 |
| RIR2_DROME        | KMS*IGHEANGQLAK     | 0.948   | 2.445 | 0.125 |
| UPTR:Q8MY9_DROME  | RRPS*EDEEEQTK       | 0.9976  | 2.498 | 0.265 |
| GYS_DROME         | VES*GADLKDYFDR      | 1       | 3.36  | 0.408 |
| UPTR:Q8IHF0_DROME | RQDS*PVKR           | 0.9989  | 2.836 | 0.216 |
| GROU_DROME        | TRS*PLDIENSKR       | 0.9922  | 3.697 | 0.112 |
| UPTR:Q7KRZ4_DROME | TRS*PLDIENSK        | 0.9896  | 2.235 | 0.141 |
| UPTR:Q6NPA6_DROME | RS*TTLYEK           | 0.9633  | 1.612 | 0.13  |
| UPTR:Q9VZQ1_DROME | SKS*PDTEDRQPSAK     | 0.9857  | 2.187 | 0.249 |
| UPTR:Q9VZQ1_DROME | SKS*PDTEDR          | 0.9847  | 1.962 | 0.18  |
| UPTR:Q6NN85_DROME | RPPS*PDAIR          | 0.9313  | 1.562 | 0.215 |
| UPTR:Q9VQK7_DROME | AHGS*EDEQVAEKEK     | 0.9819  | 1.903 | 0.229 |
| UPTR:Q9VQK7_DROME | AHGS*EDEQVAEK       | 1       | 2.748 | 0.456 |
| UPTR:Q86LF5_DROME | SKS*PTPLPGK         | 0.9439  | 2.081 | 0.23  |
| UPTR:Q9VBZ5_DROME | AKVS*PTGPVR         | 0.9979  | 2.051 | 0.314 |
| UPTR:Q6AWQ1_DROME | RQS*PQQNR           | 0.9799  | 1.902 | 0.161 |
| UPTR:Q9Y145_DROME | HAS*PLPAAPR         | 0.998   | 1.978 | 0.432 |
| UPTR:Q7KN56_DROME | TNIFGS*PKR          | 0.9121  | 1.476 | 0.148 |
| UPTR:Q9VWH6_DROME | TTS*LNQLKK          | 0.9723  | 1.492 | 0.198 |
| YC17_DROME        | WRDES*DDEEGDQK      | 0.9941  | 2.971 | 0.18  |
| VAV_DROME         | SHS*DEAIYK          | 0.993   | 1.938 | 0.29  |
| UPTR:Q7Z2C9_DROME | KFS*GGDQDEATPNKK    | 1       | 2.884 | 0.294 |
| GP:AY122261_1     | LKNQDS*DDEDVEAR     | 0.9917  | 3.056 | 0.159 |
| UPTR:Q9VNA1_DROME | FES*VDKLSR          | 0.9971  | 2.132 | 0.254 |
| UPTR:Q9VU43_DROME | KTGS*VEPAPAK        | 0.9937  | 2.366 | 0.156 |
| UPTR:Q9VU43_DROME | TGS*VEPAPAK         | 0.9944  | 2.478 | 0.219 |
| UPTR:Q8INM3_DROME | AVRS*PAVEQK         | 0.9955  | 2.035 | 0.241 |
| UPTR:Q9Y162_DROME | SDS*DDEDGDDPEKKK    | 0.995   | 2.799 | 0.211 |
| UPTR:Q7KRZ4_DROME | NSVS*PADREK         | 0.9692  | 1.733 | 0.214 |
| UPTR:Q9V695_DROME | KSTS*PTELSR         | 0.907   | 1.908 | 0.035 |
| UPTR:Q9NJH7_DROME | AGKNDDS*DDEEVVPAK   | 1       | 3.905 | 0.312 |
| UPTR:Q9VYV4_DROME | NAGVGVGVEKES*PDLKK  | 0.9761  | 1.706 | 0.247 |
| UPTR:Q94885_DROME | KES*TETGSER         | 0.9716  | 1.813 | 0.193 |
| UPTR:Q9W3W1_DROME | SQVDEKQPS*PVPLRR    | 1       | 2.792 | 0.357 |
| UPTR:Q9W3W1_DROME | SQVDEKQPS*PVPLR     | 0.9987  | 2.829 | 0.38  |
| UPTR:Q9VP57_DROME | HFEVHQSPS*ASTVSPK   | 0.9012  | 3.276 | 0.013 |
| UPTR:Q9VP57_DROME | HFEVHQSPSASTVS*PK   | 0.9801  | 3.777 | 0.07  |
| UPTR:O16040_DROME | TADS*PAKEPQEICEVK   | 0.9129  | 3.622 | 0.402 |
| UPTR:Q9W2V7_DROME | RADRS*DDEGDALPNSK   | 1       | 3.508 | 0.397 |
| UPTR:Q8SWR4_DROME | DQS*PVPEGSAR        | 0.9955  | 2.01  | 0.339 |
| UPTR:Q9V859_DROME | ASAFQFS*DDEEEVKR    | 0.9582  | 2.144 | 0.204 |
| UPTR:Q8MR49_DROME | AS*AFQFSDEEEVKR     | 0.9552  | 3.014 | 0.021 |
| UPTR:Q8MR49_DROME | ASAFQFS*DDEEEVK     | 0.9972  | 2.573 | 0.321 |
| UPTR:Q9VZ00_DROME | HAVKPAALSPSPSS*PSAR | 0.9623  | 4.02  | 0.017 |
| UPTR:Q9VZ00_DROME | HAVKPAALSPSPS*SPSAR | 0.9515  | 3.931 | 0.007 |
| SSRP_DROME        | NYKPEAGGDS*DNEKGGK  | 1       | 2.653 | 0.394 |
| UPTR:Q9V3H9_DROME | KAKS*PIIFNR         | 0.9967  | 2.037 | 0.271 |

| Protein           | Sequence                   | P-value | Xcorr | dCn   |
|-------------------|----------------------------|---------|-------|-------|
| GP:AE003832_37    | KAGDAANKDEDS*DNETH         | 0.937   | 2.78  | 0.095 |
| GP:AE003832_37    | AGDAANKDEDS*DNETH          | 0.9689  | 3.252 | 0.095 |
| HMGD_DROME        | SKKEESDEDDDES*E            | 0.9993  | 3.1   | 0.325 |
| HMGD_DROME        | SKKEES*DEDDDESE            | 1       | 4.232 | 0.296 |
| HMGD_DROME        | KEESDEDDDES*E              | 1       | 4.01  | 0.541 |
| HMGD_DROME        | KEES*DEDDDESE              | 1       | 3.599 | 0.488 |
| UPTR:Q8MRH4_DROME | ATVSTAAPHIVRDPSPAR         | 1       | 3.098 | 0.408 |
| UPTR:Q9VNA1_DROME | RAS*QDVSSLSR               | 0.9986  | 2.135 | 0.37  |
| UPTR:Q9VAE9_DROME | RKS*AGDEVVK                | 0.9817  | 1.746 | 0.182 |
| UPTR:Q9NHN6_DROME | RFS*DDIADQR                | 0.9978  | 2.262 | 0.271 |
| UPTR:Q9V3V0_DROME | NGSGAVDS*PPPPK             | 0.9892  | 2.309 | 0.211 |
| UPTR:Q8IH82_DROME | KTGNLASS*QPK               | 0.9617  | 2.118 | 0.11  |
| RS3A_DROME        | VFEVS*LADLQK               | 0.9976  | 2.395 | 0.337 |
| UPTR:Q9UB07_DROME | HSS*PTAVAVTPAK             | 0.9952  | 3.359 | 0.147 |
| UPTR:Q9VGZ9_DROME | DLNDS*PKVEQK               | 0.9993  | 3.016 | 0.296 |
| UPTR:Q9VW6_DROME  | KLS*PSESPESSK              | 0.9085  | 1.816 | 0.047 |
| DKC1_DROME        | KPAAQEVSP*PTNGSSEPSKR      | 0.9804  | 2.796 | 0.151 |
| UPTR:Q9W2U7_DROME | LAFS*DDESTPEEHQGGK         | 0.9688  | 2.114 | 0.17  |
| UPTR:Q9V624_DROME | EAEATS*PSEINTR             | 0.9248  | 1.773 | 0.125 |
| UPTR:Q8MR20_DROME | RSS*DSDLVTPK               | 0.9265  | 1.424 | 0.183 |
| UPTR:Q9W2J6_DROME | KTDKESEETGS*S              | 0.9544  | 2.239 | 0.007 |
| UPTR:Q9VAE9_DROME | LAGTGSNS*LGSSSTR           | 0.9916  | 2.56  | 0.222 |
| UPTR:Q9VY91_DROME | FVS*EGDGGHVKPTFTMRD        | 0.996   | 3.579 | 0.183 |
| UPTR:Q867Y1_DROME | RAPS*PPPAKPAEPPKPAEPR      | 0.9956  | 3.3   | 0.198 |
| UPTR:Q867Y1_DROME | APS*PPPAKPAEPPKPAEPR       | 0.9983  | 2.085 | 0.404 |
| UPTR:Q9VFF3_DROME | VQALGES*DDEVVEVPIER        | 0.9948  | 2.295 | 0.251 |
| UPTR:Q8IGE9_DROME | S*ISLKEEDTDVEQHQNRR        | 0.9872  | 3.81  | 0     |
| UPTR:Q9VT61_DROME | ADDAS*DEEDVKVK             | 0.9976  | 1.946 | 0.348 |
| HSP27_DROME       | RAS*GGPNALLPAVGK           | 1       | 3.335 | 0.438 |
| UPTR:Q8MPP1_DROME | SVS*PTTAATSSSPVK           | 0.9771  | 2.69  | 0.095 |
| UPTR:Q24478_DROME | EAVTAS*EGEDDVHLEADNIR      | 0.9568  | 1.992 | 0.169 |
| UPTR:O17045_DROME | NVGIFIKDDS*DEEDVDDKK       | 0.9978  | 2.489 | 0.295 |
| UPTR:Q6AWP8_DROME | AASDASEALGSGSALS*PTAAKPIK  | 0.9383  | 3.497 | 0.038 |
| GP:M26400_1       | KIDAGLS*ASQQNLVDNHSIAK     | 0.9594  | 4.819 | 0.413 |
| GP:M26400_1       | KIDAGLSAS*QQNLVDNHSIAK     | 0.9732  | 4.747 | 0.463 |
| GP:M26400_1       | IDAGLSAS*QQNLVDNHSIAK      | 0.9516  | 2.892 | 0.082 |
| UPTR:Q9VBP9_DROME | RTS*TTVLDSQAFK             | 0.9922  | 2.776 | 0.092 |
| UPTR:Q9V5A0_DROME | KLS*EEYTSSSAQK             | 0.9972  | 2.023 | 0.361 |
| UPTR:Q9V468_DROME | EDLAAGDAPPS*PTTK           | 0.9875  | 3.486 | 0.056 |
| UPTR:Q8MZ42_DROME | NVAENLASGSSS*PSR           | 0.9862  | 3.05  | 0.096 |
| UPTR:Q8T080_DROME | SNS*QEADSEELLR             | 0.9721  | 2.832 | 0.04  |
| UPTR:Q6NP07_DROME | NLAEEEEAGTHQNNVSTS*PK      | 0.9458  | 3.884 | 0.015 |
| GP:AE003480_69    | SELDDLDS*NQVAEEAPSAIVR     | 0.9258  | 3.007 | 0.052 |
| UPTR:Q9VUY9_DROME | ALGGIVLTAS*HNPGGPENDFGIK   | 0.9294  | 3.546 | 0.025 |
| UPTR:Q9XYZ7_DROME | TSLFSCADSKDS*PK            | 1       | 3.494 | 0.36  |
| UPTR:O96829_DROME | DAAES*PAAVDASASATDDVADKK   | 0.9554  | 1.937 | 0.194 |
| UPTR:Q9W019_DROME | NPEHAAS*DDEVANK            | 1       | 3.537 | 0.522 |
| UPTR:Q5BII8_DROME | TGPAPFKS*PAQSGGSK          | 0.9262  | 1.39  | 0.246 |
| UPTR:O16048_DROME | S*QSSENILNEKDR             | 0.964   | 2.456 | 0.147 |
| UPTR:Q9VUZ8_DROME | RAAIDS*DDDEDYGC            | 1       | 3.752 | 0.437 |
| UPTR:Q9VBX3_DROME | KKESNS*EDELEYDPSLYPQR      | 0.9556  | 3.993 | 0.032 |
| UPTR:Q6NLK4_DROME | KKES*NSEDELEYDPSLYPQR      | 0.968   | 3.977 | 0.069 |
| UPTR:Q9VHC0_DROME | AQS*LAGEGEKEKDNK           | 0.9915  | 1.62  | 0.364 |
| UPTR:Q9VHC0_DROME | AQS*LAGEGEKEK              | 0.9793  | 1.832 | 0.158 |
| UPTR:Q9V426_DROME | KKENDS*EEELEYDPALYPQR      | 1       | 4.185 | 0.402 |
| UPTR:Q9V426_DROME | KENDS*EEELEYDPALYPQR       | 0.9606  | 2.342 | 0.172 |
| UPTR:Q86B44_DROME | SDLMLESGCPELS*PR           | 0.9971  | 2.503 | 0.332 |
| SRR55_DROME       | NGNAS*PDRNNESMDD           | 1       | 3.179 | 0.467 |
| UPTR:Q9VXE6_DROME | ELPEES*EEEEEEDESSAGALR     | 1       | 4.598 | 0.482 |
| GP:AF006529_1     | EKEVS*DDEADDEKK            | 0.994   | 1.625 | 0.33  |
| UPTR:Q9V6S4_DROME | VFGSLKPSNQGDS*DGE          | 0.9964  | 2.983 | 0.243 |
| UPTR:Q8INW7_DROME | SPTAGHDFNGSSTTPGYANQGS*LPR | 0.9969  | 2.804 | 0.248 |

| Protein           | Sequence                            | P-value | Xcorr | dCn   |
|-------------------|-------------------------------------|---------|-------|-------|
| UPTR:Q9V534_DROME | LQCLAGVMVTAS*HNPK                   | 0.9943  | 4.013 | 0.082 |
| UPTR:Q8ML25_DROME | LQS*GGEGVGITSEQLAK                  | 1       | 3.643 | 0.492 |
| UPTR:Q9VXK5_DROME | DVLQNIQS*DDDEETYDLNLLAK             | 1       | 5.017 | 0.375 |
| UPTR:Q9VYV4_DROME | VLDGDDTNDGVGVDLDES*QGAGGR           | 0.9507  | 2.219 | 0.196 |
| UPTR:Q9VMJ7_DROME | IVEDNFS*NDEDEPR                     | 1       | 3.387 | 0.436 |
| UPTR:Q5BHY9_DROME | NS*PATPVYQETAPGPR                   | 0.985   | 2.438 | 0.172 |
| MODU_DROME        | VQEEETVVPQS*PSKK                    | 0.9928  | 2.903 | 0.099 |
| MODU_DROME        | SEGADEVDES*DDDEEAPVEKPVSK           | 1       | 3.413 | 0.326 |
| UPTR:Q9VSH4_DROME | KS*PEPVVAEAAEAPSSK                  | 1       | 3.739 | 0.544 |
| UPTR:Q24496_DROME | TPFASTPNDS*PDVILK                   | 0.9924  | 2.577 | 0.218 |
| UPTR:P91675_DROME | TATVGADS*DEEDIEPPQPDAGDLTR          | 0.9396  | 4.196 | 0.004 |
| UPTR:Q9V3V0_DROME | YEDEDDDRVRGS*PR                     | 0.9749  | 2.016 | 0.153 |
| ARS2_DROME        | KPVRPVNS*DGENWDDDDAENSAPK           | 1       | 3.485 | 0.437 |
| UPTR:Q9VI58_DROME | KTS*LPGSTAPNIAAPVTK                 | 0.9952  | 3.36  | 0.083 |
| UPTR:Q8SXI8_DROME | GGGGGS*GSNLNEQTAEDGQAQQQQQPR        | 0.9196  | 3.875 | 0.004 |
| UPTR:Q8SXI8_DROME | GGGGGSGS*NLNEQTAEDGQAQQQQQPR        | 0.9794  | 3.651 | 0.001 |
| ATU_DROME         | KAPAAADIFGDADDIS*DEDEAGPAAR         | 0.9962  | 2.451 | 0.28  |
| MCM2_DROME        | AAGIHRDDRDLGFGQS*DEDDVGPR           | 0.9966  | 2.545 | 0.292 |
| MCM2_DROME        | DLGFGQS*DEDDVGPR                    | 1       | 3.733 | 0.5   |
| MCM2_DROME        | DDRDLGFGQS*DEDDVGPR                 | 1       | 4.751 | 0.525 |
| GP:S80255_1       | AVRPSDNISLPPTS*PGNISLPATSPAR        | 0.9386  | 3.453 | 0.056 |
| UPTR:Q6AWQ1_DROME | SS*VEYAGPAVNTIDLCR                  | 0.9613  | 3.04  | 0     |
| UPTR:Q9VU43_DROME | S*SVEYAGPAVNTIDLCR                  | 0.9374  | 2.802 | 0     |
| UPTR:Q9I7T7_DROME | SVATSTS*TENLSAAATASK                | 0.9892  | 4.212 | 0.074 |
| UPTR:Q8IGZ9_DROME | SGSVSSASSVSSS*TENLK                 | 0.9941  | 4.236 | 0.059 |
| UPTR:Q86BS3_DROME | VENSEAPAPVS*PAPVPQK                 | 1       | 3.132 | 0.493 |
| UPTR:Q9VVG9_DROME | IEVKS*DDIDEVPVEK                    | 0.9978  | 2.33  | 0.299 |
| UPTR:Q9UB07_DROME | YALDNTDIGQPES*DEELCDEATRPR          | 0.9987  | 3.387 | 0.256 |
| UPTR:Q8IGG3_DROME | SGS*VSSFDPALDENNTSSGLNSPTDSLPK      | 0.9578  | 4.342 | 0.017 |
| UPTR:Q9V4M0_DROME | ESS*SDDDQAFYAGGSDR                  | 0.9768  | 3.429 | 0.003 |
| UPTR:Q9V4M0_DROME | ESSS*DDDQAFYAGGSDR                  | 0.9796  | 3.761 | 0.005 |
| UPTR:Q9V544_DROME | VSVLDELDDELPS*DEEKADETNRPK          | 0.907   | 2.98  | 0.085 |
| UPTR:Q8MQK4_DROME | TTS*IGNQTTTANPSECIIR                | 0.9063  | 2.441 | 0     |
| UPTR:Q9VN21_DROME | TTS*QTDNEQPQGETAQK                  | 0.9919  | 4.533 | 0.001 |
| UPTR:Q8MYV4_DROME | ESESAAGTPVNADQPGS*PNAK              | 1       | 3.239 | 0.422 |
| SQD_DROME         | DVTADGPGS*ENGDAGAAGSTNGSSDNQSAASGQR | 0.9979  | 4.622 | 0.167 |
| UPTR:Q9VU84_DROME | INVFNQNPQDAPVPS*PPR                 | 0.9987  | 3.373 | 0.322 |
| UPTR:Q9VBX3_DROME | TTGETSPQAEKEDS*ANEQSADPAVAEEDESK    | 0.9954  | 5.046 | 0.121 |
| UPTR:Q9VBX3_DROME | TTGETS*PQAEKEDSANEQSADPAVAEEDESK    | 0.95    | 3.621 | 0.021 |
| UPTR:O16043_DROME | KESSEAVLPAVENGSSEVTNGDS*TDAPAIEAVK  | 0.9022  | 4.28  | 0.138 |
| UPTR:Q9V468_DROME | RRS*PER                             | 0.9186  | 1.539 | 0.059 |
| UPTR:Q8MQS4_DROME | SSS*LDLNK                           | 0.9461  | 1.852 | 0.135 |
| UPTR:Q9VL57_DROME | SAS*GADVTEK                         | 0.9933  | 2.029 | 0.287 |
| UPTR:Q8SZS8_DROME | SKS*PVPVTVK                         | 0.9838  | 1.719 | 0.255 |
| UPTR:Q9VWS3_DROME | SSGS*SLNIQR                         | 0.9318  | 1.588 | 0.181 |
| UPTR:Q9VHR6_DROME | GRGS*VESLNR                         | 0.9342  | 1.494 | 0.22  |
| UPTR:Q9VLD6_DROME | AFS*ADRTPLK                         | 0.9936  | 1.954 | 0.239 |
| UPTR:Q6XHX7_DROYA | APS*ADNVNVAR                        | 0.9674  | 1.571 | 0.288 |
| UPTR:Q8IGE9_DROME | RTTKS*EGDQSGVEAGAK                  | 0.9956  | 3.171 | 0.159 |
| UPTR:Q8IGE9_DROME | SEGDQS*GVEAGAK                      | 0.9963  | 3.092 | 0.209 |
| UPTR:Q9VN21_DROME | TTKS*EGDQSGVEAGAK                   | 0.9906  | 3.016 | 0.164 |
| UPTR:Q9V4Z4_DROME | VRQAAGS*DDDES                       | 0.9971  | 2.017 | 0.289 |
| UPTR:Q9VK59_DROME | NTS*PDGGNFSR                        | 0.9801  | 2.276 | 0.169 |
| UPTR:Q960C4_DROME | RRGS*PSFLDR                         | 0.9572  | 1.521 | 0.178 |
| UPTR:Q960C4_DROME | RGS*PSFLDR                          | 0.9542  | 1.622 | 0.209 |
| UPTR:Q9V6Q6_DROME | LES*PERLDTKPAELLK                   | 0.9957  | 2.07  | 0.253 |
| UPTR:Q8IMW2_DROME | RRNS*NEQPPPPPEVK                    | 0.9992  | 3.39  | 0.235 |
| UPTR:Q9W261_DROME | SAS*PLSTPALNR                       | 0.922   | 1.826 | 0.143 |
| ARS2_DROME        | KELAEDSKDS*DSKPEDK                  | 0.9712  | 2.953 | 0.086 |
| NCD_DROME         | SRS*ACDINELR                        | 0.996   | 2.387 | 0.189 |
| UPTR:Q9VZ00_DROME | VSTS*PPPTIAASR                      | 0.9472  | 1.613 | 0.214 |
| UPTR:Q8MSU7_DROME | IPS*PSRPSIQANSFQDPR                 | 0.9897  | 3.628 | 0.1   |

| Protein           | Sequence                            | P-value | Xcorr | dCn   |
|-------------------|-------------------------------------|---------|-------|-------|
| UPTR:Q24147_DROME | SHS*TGSPKDER                        | 0.9337  | 2.203 | 0.001 |
| UPTR:Q917K6_DROME | KKPEDPSSEAEALCS*PAKR                | 0.9739  | 2.165 | 0.153 |
| UPTR:Q917K6_DROME | KKPEDPSSEAEALCS*PAK                 | 1       | 3.945 | 0.353 |
| UPTR:Q9W179_DROME | LSNFRGS*APDLSR                      | 0.901   | 1.814 | 0.048 |
| UPTR:Q9W1H5_DROME | DNHES*RLSPFQK                       | 0.9573  | 1.139 | 0.338 |
| UPTR:Q8IME2_DROME | WVAEGS*PTHSTPVR                     | 0.9749  | 2.978 | 0.051 |
| UPTR:Q8MR29_DROME | VEPEDDS*DEELVR                      | 0.9517  | 1.647 | 0.214 |
| UPTR:Q8MZC0_DROME | SNTGS*DEEDGAPVLSK                   | 0.9929  | 2.631 | 0.221 |
| GP:AE003493_34    | RQS*LELTPEQLER                      | 0.9973  | 1.69  | 0.379 |
| UPTR:Q9VJ87_DROME | TQDS*DEFNLEGPQSK                    | 0.9946  | 3.404 | 0.15  |
| UPTR:Q46093_DROME | SDPLLQDQSVGV*PIR                    | 0.999   | 2.642 | 0.409 |
| UPTR:Q8MQK8_DROME | LIFEDVPIQKES*DGEDPEEKPEEK           | 0.938   | 2.082 | 0.167 |
| UPTR:Q9VHC8_DROME | NNS*QQSTGTVASTGTTPSK                | 0.9879  | 2.429 | 0.202 |
| UPTR:Q8MSN4_DROME | ILPDDGSAS*PIKNNVDSK                 | 0.9248  | 1.434 | 0.229 |
| UPTR:Q9VAW4_DROME | KDTS*PSASIEGAGSSGNEAK               | 0.9898  | 3.815 | 0.001 |
| UPTR:Q9VAW4_DROME | DTS*PSASIEGAGSSGNEAK                | 0.9414  | 2.563 | 0.053 |
| UPTR:Q9VAW4_DROME | DTS*PSASIEGAGSSGNEAK                | 0.9578  | 2.969 | 0.001 |
| UPTR:Q9VT61_DROME | DKDADGGDES*DDDDDEEDDEKDEK           | 1       | 4.524 | 0.458 |
| UPTR:Q9VXF9_DROME | SANRPVGGNPAISTLDFSNIAVPGTSSGGS*PPSR | 0.9497  | 2.816 | 0.099 |
| UPTR:Q9XZ21_DROME | RSS*PEDDKLR                         | 0.9859  | 2.592 | 0.12  |
| UPTR:Q9VUL1_DROME | GCRLS*PR                            | 0.9596  | 1.757 | 0.152 |
| UPTR:Q9VAW5_DROME | SGS*LGKPKQVANR                      | 0.9513  | 2.205 | 0.161 |
| UPTR:Q9VYQ8_DROME | NS*PPQLPK                           | 0.9616  | 1.304 | 0.346 |
| UPTR:Q86BR5_DROME | RPPS*PPPR                           | 0.9653  | 2.192 | 0.106 |
| UPTR:Q9VLT5_DROME | SSNFGDHANAS*PPR                     | 0.9953  | 1.888 | 0.276 |
| UPTR:Q9VSW1_DROME | APS*DSKEFHEVTK                      | 0.9971  | 2.146 | 0.329 |
| UPTR:Q8MRS4_DROME | RLS*LADASK                          | 0.991   | 1.957 | 0.237 |
| GP:U01842_1       | SLTPSKTS*PR                         | 0.9353  | 1.896 | 0.097 |
| UPTR:Q86BM5_DROME | SSS*PPPPLPK                         | 0.9795  | 1.844 | 0.253 |
| UPTR:Q8MRM6_DROME | SQS*PPRTEQVVMTPR                    | 0.9848  | 2.635 | 0.149 |
| UPTR:Q9GQN4_DROME | KRPLDS*DPENEQTKR                    | 0.9608  | 2.071 | 0.14  |
| UPTR:Q8MRH4_DROME | SS*SPAPVPVAVAR                      | 0.913   | 2.523 | 0.003 |
| UPTR:Q86R99_DROME | RTQS*FENDQK                         | 0.9952  | 1.817 | 0.318 |
| UPTR:Q9V5T3_DROME | GTDS*DGEPSAQQ                       | 0.9314  | 2.074 | 0.101 |
| UPTR:Q7KMK8_DROME | ENAPVAKS*PEKK                       | 0.9803  | 1.689 | 0.233 |
| UPTR:Q9W4I2_DROME | RVS*ENQEIEDR                        | 0.9987  | 2.22  | 0.403 |
| UPTR:Q8MRH0_DROME | RSS*VGIGVEQHTVDVGGQAEER             | 0.9497  | 2.429 | 0.13  |
| UPTR:Q8MR13_DROME | KENS*SDSLASGSQK                     | 0.9721  | 2.174 | 0.116 |
| UPTR:Q24036_DROME | EGGEQEK*NEQEGTEGDKIEK               | 0.9185  | 1.983 | 0.202 |
| UPTR:Q9W5W9_DROME | LLGSIS*PEPSTPAPR                    | 0.9818  | 1.849 | 0.356 |
| UPTR:Q9VKD8_DROME | TLGES*DEETDNVSK                     | 0.9051  | 1.886 | 0.144 |
| UPTR:Q86BS3_DROME | SDTAAPHS*PLPAGSQVSPSSRPSR           | 0.9741  | 1.978 | 0.204 |
| ECM29_DROME       | ELRKES*DDEDEPNTSQELSADER            | 1       | 3.037 | 0.412 |
| GP:AY069224_1     | KES*DDEDEPNTSQELSADER               | 0.9962  | 3.096 | 0.205 |
| UPTR:Q9VYV4_DROME | NTATES*ETENENTNPAALPLQSGEAK         | 0.9166  | 2.944 | 0.044 |
| HP1_DROME         | KIDNPESSAKVS*DAEEEEEEYAVEK          | 0.9847  | 3.49  | 0.103 |
| HP1_DROME         | IDNPESSAKVS*DAEEEEEEYAVEK           | 0.9857  | 2.831 | 0.148 |
| UPTR:Q9NJH7_DROME | QAAVAENAGEDEAS*DDEEGGSTVK           | 0.9072  | 1.362 | 0.348 |
| UPTR:Q9V608_DROME | KHVS*LDVK                           | 0.9625  | 1.572 | 0.134 |
| UPTR:Q9VKJ9_DROME | KAPS*PPKPK                          | 0.9975  | 1.581 | 0.402 |
| UPTR:Q9VC60_DROME | DFDQS*PTR                           | 0.9714  | 1.768 | 0.187 |
| UPTR:Q8SWR4_DROME | LRS*PEQEDQK                         | 0.9927  | 2.027 | 0.181 |
| UPTR:Q8MKN2_DROME | SRS*PGGQSAASGGGK                    | 0.9767  | 1.991 | 0.143 |
| 41_DROME          | LLQDPLLS*PTTR                       | 0.9614  | 1.86  | 0.174 |
| GP:L08825_1       | SGYKDVDFGDS*DNENEPDAYLAR            | 0.9959  | 3.019 | 0.226 |
| GP:L08825_1       | DVDFGDS*DNENEPDAYLAR                | 1       | 3.624 | 0.42  |
| UPTR:Q9W4L2_DROME | TS*PIQVNGAALACPLVR                  | 0.9683  | 3.239 | 0.511 |
| UPTR:Q9W584_DROME | SLS*NVNPLLLCTTPQK                   | 0.9176  | 2.591 | 0.364 |
| UPTR:Q9W0B0_DROME | FKS*PAHS*PEAPPKK                    | 1       | 2.618 | 0.324 |
| HMGD_DROME        | SKKEES*DEDDDES*E                    | 0.9769  | 3.011 | 0.112 |
| HMGD_DROME        | S*KKEESEDDDES*E                     | 0.9252  | 2.773 | 0.048 |
| HMGD_DROME        | KEES*DEDDDES*E                      | 0.9985  | 2.15  | 0.359 |

| Protein           | Sequence                            | P-value | Xcorr | dCn   |
|-------------------|-------------------------------------|---------|-------|-------|
| HMGD_DROME        | KKEES*DEDDDDDES*E                   | 1       | 3.805 | 0.472 |
| GP:AF119716_1     | MLQKS*DDS*ADEKEAPVSSK               | 0.9971  | 2.334 | 0.32  |
| GP:AE003480_69    | AVDLVDDS*NDVDNS*IEAEEKPR            | 1       | 2.997 | 0.305 |
| UPTR:Q5U167_DROME | ILDPSHNDS*DNDS*DFNEDVECASR          | 0.9715  | 3.187 | 0.1   |
| UPTR:Q9XZ21_DROME | AQS*PSIEINAAQLS*PTHNATENVNP         | 0.9119  | 2.203 | 0.166 |
| GP:AE003627_46    | KPEANDDDDVDFLFGS*DS*EEEDGEAAR       | 0.9903  | 2.948 | 0.212 |
| UPTR:Q6NLK4_DROME | TTGETS*PQAEKEDS*ANEQSADPAVAEEDESK   | 0.9797  | 4.973 | 0.044 |
| UPTR:Q9VN21_DROME | TTKS*EGDQS*GVEAGAK                  | 0.9283  | 1.489 | 0.159 |
| UPTR:Q86BM5_DROME | SSS*PPPPLPKS*PPPSR                  | 0.9514  | 2.156 | 0.134 |
| UPTR:Q9VJK6_DROME | QS*PVLNLSKSGGNTDHGGSNCDAGS*ER       | 0.9369  | 1.522 | 0.195 |
| UPTR:Q960C4_DROME | LRAQS*DDGS*DAETGVDGAALAEFQQR        | 0.9342  | 2.439 | 0.125 |
| HMGZ_DROME        | KKES*S*EEEEDES*E                    | 0.9861  | 1.999 | 0.202 |
| UPTR:Q6IKY8_DROME | CTHQGNPIAVS*IS*HFAY*PLGQLK          | 0.955   | 2.167 | 0.14  |
| UPTR:Q9VK58_DROME | TINQIFKSGHMGLEKNTFS*HY*R            | 0.9175  | 2.958 | 0.096 |
| UPTR:O16043_DROME | ADEAVAT*PEKK                        | 0.9989  | 2.518 | 0.312 |
| PSA3_DROME        | KAGDAANKDESDNET*H                   | 0.9256  | 2.124 | 0.045 |
| C190_DROME        | APSSFGST*GSVSK                      | 0.9236  | 2.456 | 0.002 |
| UPTR:Q8IGE9_DROME | SISLKEEDT*DVEQHQNRR                 | 0.9892  | 3.174 | 0.152 |
| UPTR:Q9VN21_DROME | TTSQT*DNEQPQGETAQKR                 | 0.9045  | 2.114 | 0.002 |
| UPTR:Q8IGE9_DROME | TT*SQTDNEQPQGETAQK                  | 0.9697  | 3.224 | 0.001 |
| RFC1_DROME        | T*ASSEDDVVAATPEPIAK                 | 0.9512  | 2.604 | 0.05  |
| UPTR:Q6XHQ8_DROYA | AAAADAAGDAADNGT*SKDGEDAADAAAAAPAK   | 0.935   | 3.301 | 0.025 |
| UPTR:Q9VAW4_DROME | KDT*SPSASIEGAGSSGNEAK               | 0.9864  | 3.357 | 0.004 |
| UPTR:O16043_DROME | ESSEAVLPAVENGSEEVTTNGDST*DAPAIEAVKR | 0.9046  | 3.338 | 0.078 |
| UPTR:Q86PC7_DROME | AAEAVT*PPPSKK                       | 0.976   | 2.448 | 0.097 |
| UPTR:Q95T28_DROME | KEEQET*DDDEDKGGSSGK                 | 0.9921  | 2.037 | 0.251 |
| UPTR:Q70HU3_DROME | TSAT*SPTDKDAPLAPLK                  | 0.9145  | 2.062 | 0     |
| UPTR:Q9VYV4_DROME | VLDGDDT*NDGVGVLDLDES*QGAGGR         | 1       | 3.873 | 0.374 |
| UPTR:Q7KRQ4_DROME | TDLEQENIKDRT*PS*PSNQNEPTQK          | 0.9526  | 3.706 | 0.071 |
| UPTR:Q9V3W7_DROME | RGT*PT*YSPVR                        | 0.942   | 1.824 | 0.053 |
| GP:AE003425_1     | QLLHGEPNVSY*ICSR                    | 0.9586  | 3.987 | 0.172 |
| UPTR:Q59E39_DROME | IYHY*IQSR                           | 0.9613  | 1.714 | 0.19  |
| UPTR:Q9VW47_DROME | EEDQVEPRPPY*EPKQDKDT*VR             | 0.9385  | 2.317 | 0.182 |

Supplementary Table 2

MMDGYAQEWPRLLTHTDNGLAMDQLGGDLPLDVGFEFPQTRAR**SNTWPCRPENFVEPTDELDS**  
**ARSNTWPCRPENFVEPTDELDS**

**ASNQQLAPGDSQQAIQNANAAK**  
**GDSQQAIQNANAAKK**  
**GDSQQAIQNANAAK**  
**PGDSQQAIQNANAAKK**

**ASNQQLAPGDSQQAIQNANAAK**  
TKA**ASNQQLAPGDSQQAIQNANAAK**KNSSRRNAWGNLSYADLI THAIGSATDKRLTLSQIYEW  
**TK**  
**TKASNQQLAPGDSQQAIQNANAAKK**  
**PGDSQQAIQNANAAKK**  
**PGDSQQAIQNANAAK**  
**ASNQQLAPGDSQQAIQNANAAK**

MVQNVVPYFKDKGDSNSSAGWKNSIRHNLSSLHNRFMRVQNEG**TGKSSWWMLNPEAKPGKSVRR**  
**SSWWMLNPEAKPGK**

**RAASMETSRYEK** **SGGGFQ**  
RAA**SMETSRYEKRR**GRAKKRVEALRQAGVVGLNDATPSPSSSVSEGLDHFPE**SPLHSGGGFQ**  
**RAASMETSRYEK** **SGGGFQ**  
**AASMETSRYEK**

**ASSNASSCGRLSPIR**  
**LSPDFR** **ASSNASSCGRLSPIR**  
**LSPDFR** **ASSNASSCGRLSPIR**  
**ASSNASSCGRLSPIR**

LCNQQQQGFSAASGLPSQPPPPYQPPQHQAQQQQQQQSPYALNGPASGYNTLQPQSQCLL  
HRSLNCSCMHNARDGLSPNSVT'TTMSPAYPNSEPSDSLNTYSNVVLDGPADTAALMVQQQQ  
QQQQQQQLSASLEGQCLEVLNNEAQPIDEFNLENFPVGNLECNVEELLQQEMSYGGLLDINI  
PLATVNTNLVNSSSGPLSISNISNLSNISSNSGSSLSLNQLQAQLQQQQQQQQAQQQQQAQQ  
QQQQHQHQQLLLNNNNSSSSLELATQTAT'TNLNARVQYSQPSVVTSPPSVH

### Supplementary Table 3

| MS Level | Protein           | Sequence                        | Peptide probability | dCn   |
|----------|-------------------|---------------------------------|---------------------|-------|
| MS3      | UPTR:O96829_DROME | AAES*PAAVDASASAAATDDVADKK       | 0.9986              | 0.469 |
| MS2      | UPTR:Q6NMV3_DROME | AAFLQHLPDALS*PTTLQK             | 0.9931              | 0.117 |
| MS3      | UPTR:Q6NMV3_DROME | AAFLQHLPDALS*PTTLQK             | 0.9642              | 0.127 |
| MS3      | UPTR:Q86B44_DROME | AAGLGALDSPYLIDS*DDEDEQK         | 0.9096              | 0.204 |
| MS2      | MCM2_DROME        | AAMT*S*PVGDFEPFENEDEILGDQTVR    | 0.9994              | 0.203 |
| MS3      | MCM2_DROME        | AAMT*S*PVGDFEPFENEDEILGDQTVR    | 0.9128              | 0.249 |
| MS2      | MCM2_DROME        | AAMT*SPVGDFEPFENEDEILGDQTVR     | 0.9033              | 0.001 |
| MS3      | MCM2_DROME        | AAMT*SPVGDFEPFENEDEILGDQTVR     | 0.9052              | 0.001 |
| MS2      | MCM2_DROME        | AAMTS*PVGDFEPFENEDEILGDQTVR     | 0.9378              | 0.029 |
| MS3      | MCM2_DROME        | AAMTS*PVGDFEPFENEDEILGDQTVR     | 0.9388              | 0.029 |
| MS2      | UPTR:Q9W352_DROME | AAS*PEIFLNPELQGIR               | 1                   | 0.485 |
| MS3      | UPTR:Q9W352_DROME | AAS*PEIFLNPELQGIR               | 1                   | 0.431 |
| MS2      | UPTR:Q6AWP8_DROME | AASDASEALGSGSALS*PTAAK          | 0.9398              | 0.191 |
| MS3      | UPTR:Q6AWP8_DROME | AASDASEALGSGSALS*PTAAK          | 0.9502              | 0.106 |
| MS2      | UPTR:Q6AWP8_DROME | AASDASEALGSGSALS*PTAAKPIK       | 0.9903              | 0.122 |
| MS3      | UPTR:Q6AWP8_DROME | AASDASEALGSGSALS*PTAAKPIK       | 0.9957              | 0.133 |
| MS2      | CAS_DROME         | AAT*PAPS*AGATAGNLSAAQVK         | 0.9555              | 0.148 |
| MS2      | UPTR:Q9V369_DROME | AATTFTFGKPSAPIGASVS*PLAK        | 0.9988              | 0.172 |
| MS3      | UPTR:Q9V369_DROME | AATTFTFGKPSAPIGASVS*PLAK        | 0.9998              | 0.134 |
| MS2      | UPTR:Q9VT61_DROME | ADDAS*DDEDVK                    | 0.9277              | 0.051 |
| MS3      | UPTR:Q9VT61_DROME | ADDAS*DDEDVK                    | 0.9642              | 0.126 |
| MS2      | UPTR:Q9VT61_DROME | ADDAS*DDEDVKVK                  | 0.9901              | 0.147 |
| MS3      | UPTR:Q9VT61_DROME | ADDAS*DDEDVKVK                  | 0.9619              | 0.193 |
| MS2      | UPTR:O16043_DROME | ADEAVAT*PEKK                    | 0.9581              | 0.08  |
| MS3      | UPTR:O16043_DROME | ADEAVAT*PEKK                    | 0.925               | 0.118 |
| MS2      | UPTR:Q961K0_DROME | ADSGPFLFTPIHFNS*VDRR            | 0.9818              | 0.131 |
| MS3      | UPTR:Q961K0_DROME | ADSGPFLFTPIHFNS*VDRR            | 0.9815              | 0.131 |
| MS2      | UPTR:Q7KRW8_DROME | AELPEDAEVIS*EDELPAASNNNTATEPK   | 0.9774              | 0.131 |
| MS3      | UPTR:Q7KRW8_DROME | AELPEDAEVIS*EDELPAASNNNTATEPK   | 0.9723              | 0.131 |
| MS2      | UPTR:Q8I1G5_DROER | AENQNS*AMDMDDEDDVPVEITSAHFEEAMK | 0.992               | 0.231 |
| MS3      | UPTR:Q8I1G5_DROER | AENQNS*AMDMDDEDDVPVEITSAHFEEAMK | 0.9112              | 0.093 |
| MS2      | SEPT1_DROME       | AERDS*SSQVVSNSVLGEK             | 0.9991              | 0.097 |
| MS3      | SEPT1_DROME       | AERDS*SSQVVSNSVLGEK             | 0.9269              | 0.097 |
| MS2      | UPTR:Q8MRH0_DROME | AES*TIESLPVIAGNER               | 0.988               | 0.081 |
| MS3      | UPTR:Q8MRH0_DROME | AES*TIESLPVIAGNER               | 0.9643              | 0.341 |
| MS2      | UPTR:Q8MRH0_DROME | AEST*IESLPVIAGNER               | 0.9754              | 0.052 |
| MS3      | UPTR:Q8MRH0_DROME | AEST*IESLPVIAGNER               | 0.92                | 0.053 |
| MS2      | GP:U07652_1       | AEVAET*PS*VEAQEEVAQPAEAQVLEAK   | 0.995               | 0.294 |
| MS3      | GP:U07652_1       | AEVAET*PS*VEAQEEVAQPAEAQVLEAK   | 0.9939              | 0.369 |
| MS2      | UPTR:Q8MYR6_DROME | AFEDDNS*DEDDL DLLQTPK           | 0.9651              | 0.396 |
| MS3      | UPTR:Q8MYR6_DROME | AFEDDNS*DEDDL DLLQTPK           | 0.963               | 0.396 |
| MS2      | UPTR:Q8IRM4_DROME | AFEDPDVT*HVEGEVDPVR             | 0.9822              | 0.141 |
| MS3      | UPTR:Q8IRM4_DROME | AFEDPDVT*HVEGEVDPVR             | 0.9817              | 0.141 |
| MS2      | UPTR:Q95ST5_DROME | AFLAQTAY*TELLALS*R              | 0.9598              | 0.23  |
| MS3      | UPTR:Q9Y130_DROME | AFLAQTAY*TELLALS*R              | 0.9471              | 0.229 |
| MS2      | UPTR:Q9VP57_DROME | AGDES*GEQNAEADIESLFEK           | 0.997               | 0.472 |
| MS3      | UPTR:Q9VP57_DROME | AGDES*GEQNAEADIESLFEK           | 0.999               | 0.475 |
| MS2      | UPTR:Q9VP57_DROME | AGDES*GEQNAEADIES*LFEK          | 0.9027              | 0.146 |
| MS3      | UPTR:Q9VP57_DROME | AGDES*GEQNAEADIES*LFEK          | 0.9999              | 0.457 |
| MS2      | UPTR:Q9VWS3_DROME | AGEADPGVIS*EDEDEFVFDNLSHK       | 0.9987              | 0.23  |
| MS3      | UPTR:Q9VWS3_DROME | AGEADPGVIS*EDEDEFVFDNLSHK       | 0.9987              | 0.23  |
| MS2      | UPTR:Q9NJH7_DROME | AGKNDDS*DEEEVPAK                | 0.9102              | 0.131 |
| MS3      | UPTR:Q9NJH7_DROME | AGKNDDS*DEEEVPAK                | 0.9494              | 0.162 |
| MS2      | UPTR:Q9VQK7_DROME | AHGS*EDEQVAEK                   | 0.9991              | 0.358 |
| MS3      | UPTR:Q9VQK7_DROME | AHGS*EDEQVAEK                   | 1                   | 0.448 |
| MS2      | UPTR:O96046_DROME | AISAFNMQMS*PVSETPPAR            | 0.9949              | 0.21  |
| MS3      | UPTR:O96046_DROME | AISAFNMQMS*PVSETPPAR            | 0.9946              | 0.212 |
| MS2      | UPTR:Q7KHA1_DROSI | ALGGIVLT*ASHNPGGPENDFGIK        | 0.982               | 0.004 |
| MS3      | UPTR:Q7KHA1_DROSI | ALGGIVLT*ASHNPGGPENDFGIK        | 0.9586              | 0.012 |

| MS Level | Protein           | Sequence                           | Peptide probability | dCn   |
|----------|-------------------|------------------------------------|---------------------|-------|
| MS2      | UPTR:Q7KHA1_DROSI | ALGGIVLTAS*HNPGGPENDFGIK           | 0.9017              | 0.149 |
| MS3      | UPTR:Q7KHA1_DROSI | ALGGIVLTAS*HNPGGPENDFGIK           | 0.9696              | 0.059 |
| MS2      | UPTR:Q6NP07_DROME | ALLTETEAQVS*PK                     | 0.9983              | 0.407 |
| MS3      | UPTR:Q6NP07_DROME | ALLTETEAQVS*PK                     | 0.9681              | 0.441 |
| MS2      | ECM29_DROME       | ALPDNS*MEVDEVPEPELK                | 0.9998              | 0.344 |
| MS3      | ECM29_DROME       | ALPDNS*MEVDEVPEPELK                | 0.9998              | 0.344 |
| MS2      | GYS_DROME         | ALQAVYPDYVDELSLYGS*K               | 0.9566              | 0.074 |
| MS2      | UPTR:Q9GU72_DROME | ALS*GEDFPALGSEAEER                 | 0.9976              | 0.3   |
| MS3      | UPTR:Q9GU72_DROME | ALS*GEDFPALGSEAEER                 | 0.9976              | 0.281 |
| MS2      | MCM2_DROME        | AMT*S*PVGDFEPFENEDEILGDQTVR        | 0.9674              | 0.251 |
| MS3      | MCM2_DROME        | AMT*S*PVGDFEPFENEDEILGDQTVR        | 0.9944              | 0.307 |
| MS2      | UPTR:Q86DR2_DROME | ANEPANAPEDS*EDEK                   | 0.998               | 0.258 |
| MS3      | UPTR:Q86DR2_DROME | ANEPANAPEDS*EDEK                   | 0.9981              | 0.258 |
| MS3      | G3P2_DROME        | ANGPLKILGY*T*DEEVVSTDFLSDTHSSVFDK  | 0.9927              | 0.253 |
| MS2      | IMA_DROME         | ANS*INTQDSR                        | 0.9406              | 0.329 |
| MS3      | IMA_DROME         | ANS*INTQDSR                        | 0.998               | 0.245 |
| MS2      | UPTR:Q9VVI9_DROME | APEAPSREPGADS*IVPGK                | 0.988               | 0.146 |
| MS3      | UPTR:Q9VVI9_DROME | APEAPSREPGADS*IVPGK                | 0.9973              | 0.278 |
| MS2      | UPTR:Q9VB74_DROME | APEGS*FINDPAEPSFR                  | 0.902               | 0.171 |
| MS2      | UPTR:Q8MMD2_DROME | APS*GEGFGDGGFVANFPK                | 0.9963              | 0.309 |
| MS3      | UPTR:Q8MMD2_DROME | APS*GEGFGDGGFVANFPK                | 0.9958              | 0.327 |
| MS2      | UPTR:Q95RV6_DROME | APS*VSPANFEDDQMLFR                 | 0.911               | 0.164 |
| MS3      | UPTR:Q9VV52_DROME | APS*VSPANFEDDQMLFR                 | 0.9405              | 0.245 |
| MS2      | UPTR:Q8SWX2_DROME | AQS*PEPLFGLLSCGADLIR               | 0.9997              | 0.329 |
| MS3      | UPTR:Q8SWX2_DROME | AQS*PEPLFGLLSCGADLIR               | 1                   | 0.481 |
| MS2      | MA205_DROME       | ARNS*TLMGEGVAPSNECVPTPNGQINAEVVK   | 0.9497              | 0.028 |
| MS3      | MA205_DROME       | ARNS*TLMGEGVAPSNECVPTPNGQINAEVVK   | 0.9105              | 0.344 |
| MS2      | UPTR:O16125_DROME | ARS*VEALLCEK                       | 0.9984              | 0.291 |
| MS3      | UPTR:O16125_DROME | ARS*VEALLCEK                       | 0.989               | 0.239 |
| MS3      | UPTR:Q8IRB9_DROME | AS*IAGTGMSLEEINK                   | 0.999               | 0.367 |
| MS2      | UPTR:Q9V9C7_DROME | AS*IVDQLSR                         | 0.9322              | 0.118 |
| MS3      | UPTR:Q6XIQ8_DROYA | AS*IVDQLSR                         | 0.9453              | 0.156 |
| MS2      | UPTR:Q86NY3_DROME | AS*SEKDEEEAEDPEK                   | 0.9571              | 0.48  |
| MS3      | UPTR:Q86NY3_DROME | AS*SEKDEEEAEDPEK                   | 0.9289              | 0.462 |
| MS2      | UPTR:Q9VNS2_DROME | AS*SVNFSAPDLDVESVK                 | 0.9766              | 0.405 |
| MS3      | UPTR:Q9VNS2_DROME | AS*SVNFSAPDLDVESVK                 | 0.9779              | 0.408 |
| MS2      | UPTR:Q8MR49_DROME | ASAFQFS*DDEEEVKR                   | 0.9696              | 0.224 |
| MS3      | UPTR:Q8MR49_DROME | ASAFQFS*DDEEEVKR                   | 0.9679              | 0.224 |
| MS2      | UPTR:O16043_DROME | ASEPTVS*FAADKDEK                   | 0.9819              | 0.161 |
| MS3      | UPTR:O16043_DROME | ASEPTVS*FAADKDEK                   | 0.9602              | 0.147 |
| MS2      | UPTR:Q95TU5_DROME | ASIVQQPDGQS*PIAAIPQLIQPSPQHSR      | 0.9999              | 0.246 |
| MS3      | UPTR:Q95TU5_DROME | ASIVQQPDGQS*PIAAIPQLIQPSPQHSR      | 0.9998              | 0.213 |
| MS2      | UPTR:Q9VVA0_DROME | ASLQLPS*PIITR                      | 0.9997              | 0.383 |
| MS3      | UPTR:Q9VVA0_DROME | ASLQLPS*PIITR                      | 0.9998              | 0.383 |
| MS2      | UPTR:Q8I1D7_DROVI | ASNIVANAS*AAAAAGADT*PATLADTTMPTLNK | 0.9971              | 0.173 |
| MS2      | UPTR:Q86NY3_DROME | ASS*EKDEEEAEDPEK                   | 0.9104              | 0.038 |
| MS3      | UPTR:Q86NY3_DROME | ASS*EKDEEEAEDPEK                   | 0.9082              | 0.038 |
| MS2      | UPTR:Q9VNS2_DROME | ASS*VNFSAPDLDVESVK                 | 0.9939              | 0.056 |
| MS3      | UPTR:Q9VNS2_DROME | ASS*VNFSAPDLDVESVK                 | 0.9294              | 0.012 |
| MS2      | UPTR:Q9U4I2_DROME | AT*ITPVVKSSSGSSK                   | 0.9069              | 0.191 |
| MS2      | MLRN_DROME        | AT*SNVFAMFDQAQIAEFK                | 0.9515              | 0.415 |
| MS3      | UPTR:Q9N618_DROSI | AT*SNVFAMFDQAQIAEFK                | 0.9639              | 0.019 |
| MS2      | UPTR:O96046_DROME | ATAPPPDVVPQIEVETVDT*PPR            | 0.9732              | 0.122 |
| MS3      | UPTR:O96046_DROME | ATAPPPDVVPQIEVETVDT*PPR            | 0.995               | 0.116 |
| MS2      | UPTR:Q9N618_DROSI | ATS*NVFAMFDQAQIAEFK                | 0.9072              | 0.005 |
| MS3      | MLRN_DROME        | ATS*NVFAMFDQAQIAEFK                | 0.9926              | 0.007 |
| MS2      | UPTR:Q9VYV4_DROME | AVDAVS*PVAAGADSAPAIGQK             | 1                   | 0.436 |
| MS3      | UPTR:Q9VYV4_DROME | AVDAVS*PVAAGADSAPAIGQK             | 1                   | 0.464 |
| MS2      | GP:S80255_1       | AVRPSDNISLPPTS*PGNISLPATSPAR       | 0.9842              | 0.169 |
| MS3      | GP:S80255_1       | AVRPSDNISLPPTS*PGNISLPATSPAR       | 0.9934              | 0.179 |
| MS3      | UPTR:Q7KVW2_DROME | CAVGY*VTPAGLQLLIEELPASKGNR         | 0.9564              | 0.238 |



| MS Level | Protein           | Sequence                       | Peptide probability | dCn   |
|----------|-------------------|--------------------------------|---------------------|-------|
| MS2      | UPTR:Q5BHU7_DROME | CLAGVMVTAS*HNPK                | 0.9558              | 0.141 |
| MS3      | UPTR:Q8SZP3_DROME | CLELLQELET*R                   | 0.9774              | 0.076 |
| MS2      | UPTR:Q9V6Z5_DROME | CSNCNQVSYCS*VQHQK              | 0.9854              | 0.175 |
| MS3      | UPTR:Q9V6Z5_DROME | CSNCNQVSYCS*VQHQK              | 0.996               | 0.217 |
| MS2      | UPTR:Q8IFW6_DROME | DAAES*PAAVDASASAATDDVADK       | 0.9991              | 0.291 |
| MS3      | UPTR:Q8IFW6_DROME | DAAES*PAAVDASASAATDDVADK       | 0.994               | 0.295 |
| MS2      | UPTR:O96829_DROME | DAAES*PAAVDASASAATDDVADKK      | 0.9819              | 0.163 |
| MS3      | UPTR:O96829_DROME | DAAES*PAAVDASASAATDDVADKK      | 1                   | 0.354 |
| MS2      | UPTR:Q8T8R1_DROME | DCS*LGGGGPGGVGGGGGGGGGMR       | 0.9984              | 0.603 |
| MS3      | UPTR:Q8T8R1_DROME | DCS*LGGGGPGGVGGGGGGGGGMR       | 0.9984              | 0.622 |
| MS2      | UPTR:Q9W2U4_DROME | DDPAAMEIDDT*S*QEVM             | 0.9544              | 0.266 |
| MS3      | UPTR:Q9W2U4_DROME | DDPAAMEIDDT*S*QEVM             | 0.9328              | 0.252 |
| MS2      | MCM2_DROME        | DDRDLGFGQS*DEEDDVGPR           | 0.9631              | 0.335 |
| MS3      | MCM2_DROME        | DDRDLGFGQS*DEEDDVGPR           | 0.9762              | 0.373 |
| MS2      | UPTR:Q6VNW7_DROST | DEADDET*KEGDDK                 | 0.9772              | 0.232 |
| MS3      | UPTR:Q6VNW7_DROST | DEADDET*KEGDDK                 | 0.9781              | 0.232 |
| MS3      | UPTR:Q86NW2_DROME | DENS*PS*AVY*EDCDPVCAGVLQATKK   | 0.9336              | 0.184 |
| MS2      | MODU_DROME        | DES*DDDEEAPVEKPVSK             | 0.9926              | 0.373 |
| MS3      | MODU_DROME        | DES*DDDEEAPVEKPVSK             | 0.9847              | 0.316 |
| MS2      | UPTR:Q8MQX4_DROME | DFS*PVIGQNVGR                  | 0.931               | 0.133 |
| MS3      | UPTR:Q8MQX4_DROME | DFS*PVIGQNVGR                  | 0.9443              | 0.148 |
| MS2      | MCM2_DROME        | DLGFGQS*DEEDDVGPR              | 1                   | 0.452 |
| MS3      | MCM2_DROME        | DLGFGQS*DEEDDVGPR              | 1                   | 0.37  |
| MS2      | UPTR:Q9VB98_DROME | DLIY*AILKHLEGPR                | 0.9876              | 0.242 |
| MS3      | UPTR:Q9VB98_DROME | DLIY*AILKHLEGPR                | 0.9882              | 0.242 |
| MS2      | UPTR:Q8IGH2_DROME | DPPEGDVIRPS*NVEPIDVKPTVTADVR   | 0.9915              | 0.102 |
| MS3      | UPTR:Q8IGH2_DROME | DPPEGDVIRPS*NVEPIDVKPTVTADVR   | 0.9815              | 0.102 |
| MS2      | UPTR:Q8IHA4_DROME | DRLDLENGDEEALFAAVERPS*TEQDQR   | 1                   | 0.406 |
| MS2      | UPTR:Q8IRB9_DROME | DRNS*IGFAFGSSTPR               | 0.9779              | 0.284 |
| MS3      | UPTR:Q8IRB9_DROME | DRNS*IGFAFGSSTPR               | 0.935               | 0.246 |
| MS2      | SSRP_DROME        | DVDFGDS*DNENEPDAYLAR           | 0.9374              | 0.135 |
| MS3      | SSRP_DROME        | DVDFGDS*DNENEPDAYLAR           | 0.9993              | 0.509 |
| MS2      | MA205_DROME       | DVLDHGPETS*VDMELPLDQVPNDADIMK  | 0.9468              | 0.059 |
| MS3      | MA205_DROME       | DVLDHGPETS*VDMELPLDQVPNDADIMK  | 0.9065              | 0.062 |
| MS2      | UPTR:Q9VXK5_DROME | DVLQNIQS*DDDEETYDLNNAK         | 0.9983              | 0.482 |
| MS3      | UPTR:Q9VXK5_DROME | DVLQNIQS*DDDEETYDLNNAK         | 0.998               | 0.369 |
| MS2      | UPTR:Q86BM5_DROME | EAAAGEDIT*PLADESIK             | 0.9999              | 0.34  |
| MS3      | UPTR:Q86BM5_DROME | EAAAGEDIT*PLADESIK             | 0.9994              | 0.287 |
| MS2      | UPTR:Q86BM5_DROME | EAAAGEDITPLADES*IK             | 0.9999              | 0.394 |
| MS3      | UPTR:Q9U7E6_DROME | EAAAGEDITPLADES*IK             | 0.9998              | 0.472 |
| MS2      | UPTR:Q9U7E6_DROME | EAAAGEDITPLADES*IKSK           | 0.9251              | 0.087 |
| MS3      | UPTR:Q86BM5_DROME | EAAAGEDITPLADES*IKSK           | 0.967               | 0.083 |
| MS2      | UPTR:Q24478_DROME | EAELENDQEEFIKEDS*PIPHS*DSVAELR | 0.908               | 0.189 |
| MS2      | UPTR:Q24478_DROME | EAELENDQEEFIKEDS*PIPHSDSVAELR  | 0.9502              | 0.113 |
| MS3      | UPTR:Q24478_DROME | EAELENDQEEFIKEDS*PIPHSDSVAELR  | 0.9595              | 0.157 |
| MS2      | UPTR:Q7YZA2_DROME | EAS*EPIIEGPLTVVSVLR            | 0.9986              | 0.303 |
| MS3      | UPTR:Q7YZA2_DROME | EAS*EPIIEGPLTVVSVLR            | 0.9985              | 0.316 |
| MS2      | UPTR:Q9V468_DROME | EDLAAGDAPPS*PTTK               | 0.9711              | 0.04  |
| MS3      | UPTR:Q9V468_DROME | EDLAAGDAPPS*PTTK               | 0.9708              | 0.038 |
| MS2      | UPTR:Q9V468_DROME | EDLAAGDAPPSPTT*K               | 0.9948              | 0.022 |
| MS3      | UPTR:Q9V468_DROME | EDLAAGDAPPSPTT*K               | 0.9205              | 0.032 |
| MS2      | UPTR:Q7KW04_DROME | EDS*EEEGEQQPER                 | 0.9898              | 0.166 |
| MS3      | UPTR:Q7KW04_DROME | EDS*EEEGEQQPER                 | 0.9991              | 0.34  |
| MS3      | KI10A_DROME       | EEMLSCS*FNPNKG                 | 0.9112              | 0.078 |
| MS2      | UPTR:Q8MZ42_DROME | EEPES*PNSGTGAVQLDALFAK         | 0.9649              | 0.011 |
| MS3      | UPTR:Q8MZ42_DROME | EEPES*PNSGTGAVQLDALFAK         | 0.9622              | 0.011 |
| MS2      | UPTR:Q8MZ42_DROME | EEPESPNSGT*VGAVQLDALFAK        | 0.9404              | 0.009 |
| MS3      | UPTR:Q8MZ42_DROME | EEPESPNSGT*VGAVQLDALFAK        | 0.9368              | 0.009 |
| MS2      | UPTR:Q7KR73_DROME | EEQLS*PLDEVQIIDDK              | 0.9999              | 0.348 |
| MS3      | UPTR:Q7KR73_DROME | EEQLS*PLDEVQIIDDK              | 0.9993              | 0.241 |
| MS2      | VINC_DROME        | EGLAPVRPPPET*DEDEGVFR          | 0.9981              | 0.445 |

| MS Level | Protein           | Sequence                             | Peptide probability | dCn   |
|----------|-------------------|--------------------------------------|---------------------|-------|
| MS3      | VINC_DROME        | EGLAPVRPPPPET*DDEDEGVFR              | 0.9973              | 0.445 |
| MS2      | UPTR:Q7YZ99_DROME | EGSEPLVAALADS*SLVDAIVSK              | 0.9731              | 0.064 |
| MS3      | UPTR:Q960C4_DROME | EGSEPLVAALADS*SLVDAIVSK              | 0.9864              | 0.067 |
| MS2      | HSP83_DROAV       | EKEVS*DDEADDDK                       | 0.9811              | 0.183 |
| MS2      | HSP83_DROME       | EKEVS*DDEADDEK                       | 0.9924              | 0.224 |
| MS3      | GP:AF006529_1     | EKEVS*DDEADDEK                       | 0.9983              | 0.281 |
| MS2      | UPTR:Q9VBU7_DROME | EKPAVAVTASAS*APTSVQTAALGFVK          | 0.9919              | 0.078 |
| MS3      | UPTR:Q9VBU7_DROME | EKPAVAVTASAS*APTSVQTAALGFVK          | 0.9094              | 0.084 |
| MS2      | GP:AE003515_37    | ELDIDS*EGESDPLWLR                    | 0.9747              | 0.041 |
| MS3      | GP:AE003515_37    | ELDIDS*EGESDPLWLR                    | 0.9055              | 0.328 |
| MS3      | GP:AF245280_1     | ELGLS*LS*PNEIGCTIADLIQQQYPEI         | 0.9998              | 0.255 |
| MS2      | UPTR:Q9VXE6_DROME | ELPEES*EEEEEEDESSAGALR               | 0.9997              | 0.444 |
| MS3      | UPTR:Q9VXE6_DROME | ELPEES*EEEEEEDESSAGALR               | 0.998               | 0.302 |
| MS3      | UPTR:Q8MSV9_DROME | ELS*LDLNPLQPR                        | 0.9592              | 0.207 |
| MS2      | UPTR:O16043_DROME | ENGAADSS*ATEPTDAVDGEK                | 0.9821              | 0.077 |
| MS3      | UPTR:O16043_DROME | ENGAADSS*ATEPTDAVDGEK                | 0.9974              | 0.074 |
| MS2      | UPTR:Q9W002_DROME | ENS*DFFLAK                           | 0.9649              | 0.198 |
| MS3      | UPTR:Q9W002_DROME | ENS*DFFLAK                           | 0.9987              | 0.257 |
| MS3      | UPTR:Q94885_DROME | ENTTFHS*PQR                          | 0.9934              | 0.19  |
| MS2      | UPTR:Q8IN86_DROME | EIQDVEDQDVS*                         | 0.9789              | 0.152 |
| MS3      | 1433E_DROME       | EIQDVEDQDVS*                         | 0.9876              | 0.153 |
| MS2      | UPTR:Q9W4C1_DROME | ERVS*QELIDCDIDFVEDTTSK               | 0.9604              | 0.257 |
| MS3      | UPTR:Q9W4C1_DROME | ERVS*QELIDCDIDFVEDTTSK               | 0.9528              | 0.257 |
| MS2      | GYS_DROME         | ES*GADLKDYFDR                        | 0.9744              | 0.292 |
| MS3      | GP:AE003707_12    | ES*GADLKDYFDR                        | 0.9404              | 0.307 |
| MS2      | UPTR:Q6NLK4_DROME | ES*NSEDELEYDPSLYPQR                  | 0.9933              | 0.357 |
| MS3      | UPTR:Q6NLK4_DROME | ES*NSEDELEYDPSLYPQR                  | 0.9781              | 0.001 |
| MS2      | UPTR:Q8MYV4_DROME | ESESAAGTPVNADQPGS*PNAK               | 0.9999              | 0.498 |
| MS3      | UPTR:Q8MYV4_DROME | ESESAAGTPVNADQPGS*PNAK               | 0.9998              | 0.378 |
| MS2      | UPTR:Q6NLK4_DROME | ESNS*EDELEYDPSLYPQR                  | 0.9929              | 0.005 |
| MS3      | UPTR:Q6NLK4_DROME | ESNS*EDELEYDPSLYPQR                  | 0.9913              | 0.326 |
| MS2      | UPTR:O16043_DROME | ESSEAVLPAVENG*EEVTNGDSTDAPAIEAVK     | 0.9806              | 0.107 |
| MS3      | UPTR:O16043_DROME | ESSEAVLPAVENG*EEVTNGDSTDAPAIEAVK     | 0.9127              | 0.052 |
| MS2      | UPTR:O16043_DROME | ESSEAVLPAVENGSEEVTVNGDS*TDAPAIEAVK   | 0.9776              | 0.026 |
| MS3      | UPTR:O16043_DROME | ESSEAVLPAVENGSEEVTVNGDS*TDAPAIEAVK   | 0.9775              | 0.026 |
| MS2      | UPTR:Q9U7E6_DROME | ETEEHS*ENDKDLTTEK                    | 0.9925              | 0.206 |
| MS3      | UPTR:Q86BM5_DROME | ETEEHS*ENDKDLTTEK                    | 0.9529              | 0.236 |
| MS2      | UPTR:Q9W3R9_DROME | ETHDDAS*NGLAPATALQEDLVK              | 0.9033              | 0.182 |
| MS3      | UPTR:Q9W3R9_DROME | ETHDDAS*NGLAPATALQEDLVK              | 0.919               | 0.054 |
| MS2      | UPTR:Q9V3W9_DROME | ETRPLSS*DELIGELAQASLQSR              | 0.9429              | 0.035 |
| MS3      | UPTR:Q9V3W9_DROME | ETRPLSS*DELIGELAQASLQSR              | 0.9422              | 0.035 |
| MS2      | UPTR:Q8MLS9_DROME | EVS*EEAEFDDDPLGDAGAAR                | 0.9949              | 0.372 |
| MS3      | UPTR:Q8MLS9_DROME | EVS*EEAEFDDDPLGDAGAAR                | 0.9989              | 0.297 |
| MS2      | GP:AE003552_29    | EVT*IEQTGEPAK                        | 0.9187              | 0.194 |
| MS3      | GP:AE003552_29    | EVT*IEQTGEPAK                        | 0.9285              | 0.194 |
| MS3      | PSMF1_DROME       | EVTQTNS*PRPIGSDPDLR                  | 0.9179              | 0.191 |
| MS2      | YC17_DROME        | FDDFNVDDEEEDS*DDNIPSLSQNDEDEEGGEDKEK | 0.9776              | 0.16  |
| MS3      | YC17_DROME        | FDDFNVDDEEEDS*DDNIPSLSQNDEDEEGGEDKEK | 0.9964              | 0.243 |
| MS2      | UPTR:Q23980_DROME | FESNRVPS*LQPSISFSR                   | 0.9978              | 0.199 |
| MS3      | UPTR:Q23980_DROME | FESNRVPS*LQPSISFSR                   | 0.9511              | 0.111 |
| MS2      | UPTR:Q24035_DROME | FGS*ASEETILK                         | 0.9417              | 0.185 |
| MS3      | UPTR:Q24035_DROME | FGS*ASEETILK                         | 0.9791              | 0.188 |
| MS2      | UPTR:Q7KR73_DROME | FS*PSTSGPELEFR                       | 0.9988              | 0.239 |
| MS3      | UPTR:Q96936_DROME | FS*PSTSGPELEFR                       | 0.9971              | 0.323 |
| MS2      | UPTR:Q8IGK8_DROME | FRTLIS*QVADLITEK                     | 0.9242              | 0.108 |
| MS3      | UPTR:Q8IGK8_DROME | FRTLIS*QVADLITEK                     | 0.9846              | 0.112 |
| MS2      | UPTR:Q9W300_DROME | FVLFFKPVFGDALVVKGSEDPT*T*TTTVR       | 0.9503              | 0.257 |
| MS2      | UPTR:Q9VY91_DROME | FVS*EGDGGHVKPTTF                     | 0.9816              | 0.328 |
| MS2      | UPTR:Q9VY91_DROME | FVS*EGDGGHVKPTTFMR                   | 0.9289              | 0.056 |
| MS2      | UPTR:Q8MSV2_DROME | GAASWTPQGY*APAAAAAAVAQQAAY*R         | 0.9312              | 0.023 |
| MS2      | UPTR:Q8IGZ9_DROME | GEPTRPIT*PGK                         | 0.9936              | 0.352 |

| MS Level | Protein           | Sequence                            | Peptide probability | dCn   |
|----------|-------------------|-------------------------------------|---------------------|-------|
| MS3      | UPTR:Q8IGZ9_DROME | GEPTRPIT*PGK                        | 0.9738              | 0.315 |
| MS2      | UPTR:Q8SXG3_DROME | GGAGAGAGASSGSGSIADFTAS*QSSAIVSGLEPK | 0.9643              | 0.104 |
| MS3      | UPTR:Q8SXG3_DROME | GGAGAGAGASSGSGSIADFTAS*QSSAIVSGLEPK | 0.9821              | 0.045 |
| MS2      | UPTR:Q8MT90_DROME | GGALPGEENLPT*SEMDLLAK               | 0.9433              | 0.095 |
| MS3      | UPTR:Q8MT90_DROME | GGALPGEENLPT*SEMDLLAK               | 0.9609              | 0.101 |
| MS2      | PSMF1_DROME       | GGG*FIPSAFEPR                       | 0.9345              | 0.223 |
| MS3      | UPTR:Q86B44_DROME | GLGALDSPYLIDS*DDEDEQK               | 0.9895              | 0.363 |
| MS3      | UPTR:O61683_DROPS | GLHGFHVHEFGDKT*NGCMSS*GPHF          | 0.995               | 0.353 |
| MS3      | UPTR:Q7KNC5_DROME | GLRPGS*PKPGHIER                     | 0.9171              | 0.232 |
| MS2      | UPTR:Q8INM3_DROME | GLS*NSTEELHPAPPQIDAIKPFDELESK       | 0.9142              | 0.018 |
| MS3      | UPTR:Q8INM3_DROME | GLS*NSTEELHPAPPQIDAIKPFDELESK       | 0.9474              | 0.007 |
| MS2      | UPTR:Q8INM3_DROME | GLSNS*TEELHPAPPQIDAIKPFDELESK       | 0.9557              | 0.029 |
| MS3      | UPTR:Q8INM3_DROME | GLSNS*TEELHPAPPQIDAIKPFDELESK       | 0.9941              | 0.083 |
| MS2      | UPTR:Q8INM3_DROME | GLSNST*EELHPAPPQIDAIKPFDELESK       | 0.9673              | 0.001 |
| MS2      | UPTR:Q5LK13_DROME | GLVNTKLS*LDIQQK                     | 0.9746              | 0.224 |
| MS3      | UPTR:Q5LK13_DROME | GLVNTKLS*LDIQQK                     | 0.9396              | 0.252 |
| MS3      | UPTR:Q59E35_DROME | GPS*PNTHTTGGVTNS*AS*LV              | 0.9792              | 0.281 |
| MS2      | UPTR:Q7KR73_DROME | GRS*FDSEPATVEDK                     | 0.9856              | 0.13  |
| MS3      | UPTR:Q7KR73_DROME | GRS*FDSEPATVEDK                     | 0.9854              | 0.19  |
| MS3      | UPTR:Q7KUX7_DROME | GVGSGAGS*GGGMNRY*NDRP               | 0.991               | 0.275 |
| MS2      | UPTR:Q9VNH2_DROME | GVS*PELIAQLGKPPR                    | 0.9907              | 0.159 |
| MS3      | UPTR:Q9VNH2_DROME | GVS*PELIAQLGKPPR                    | 0.9897              | 0.277 |
| MS3      | UPTR:Q9W1J0_DROME | GVTLPGAS*T*GILFYLT*PDWK             | 0.9702              | 0.148 |
| MS2      | CPD1_DROME        | HEDNDDDQDDENS*GEEEHSSPEK            | 0.9987              | 0.427 |
| MS3      | GP:AY094819_1     | HEDNDDDQDDENS*GEEEHSSPEK            | 0.961               | 0.268 |
| MS2      | UPTR:Q9VYA7_DROME | HEQSQAFNAETTTVNDVAGS*LR             | 0.9563              | 0.123 |
| MS3      | UPTR:Q9VW47_DROME | HNEFDDS*NVDDDLKLVQNIK               | 0.9967              | 0.257 |
| MS2      | UPTR:Q8ML25_DROME | HNS*GLEGIVDSGNSVAEEK                | 0.9976              | 0.228 |
| MS3      | UPTR:Q8ML25_DROME | HNS*GLEGIVDSGNSVAEEK                | 0.9787              | 0.206 |
| MS2      | UPTR:Q4V5R8_DROME | HS*NIS*FPYGPISPLQAAQIR              | 0.9164              | 0.159 |
| MS3      | UPTR:Q4V5R8_DROME | HS*NIS*FPYGPISPLQAAQIR              | 0.917               | 0.159 |
| MS2      | GP:M26400_1       | IDAGLSAS*QQNLVDNHSIAK               | 0.9938              | 0.097 |
| MS3      | GP:M26400_1       | IDAGLSAS*QQNLVDNHSIAK               | 0.9932              | 0.097 |
| MS2      | UPTR:Q7KRQ9_DROME | IDEPLHS*PGLNGDLDPVFR                | 0.9965              | 0.332 |
| MS3      | UPTR:Q7KRQ9_DROME | IDEPLHS*PGLNGDLDPVFR                | 0.9985              | 0.282 |
| MS2      | GP:AF396455_1     | IDLPGSEAIAS*PK                      | 0.9332              | 0     |
| MS3      | BTHD_DROME        | IDLPGSEAIAS*PK                      | 0.9417              | 0.24  |
| MS2      | UPTR:Q6XJ26_DROYA | IDNPES*S*VKGS*DGEEEEYAVEK           | 0.985               | 0.13  |
| MS3      | UPTR:Q6XJ26_DROYA | IDNPES*S*VKGS*DGEEEEYAVEK           | 0.9376              | 0.133 |
| MS2      | HP1_DROME         | IDNPESAKVS*DAEEEEYAVEK              | 0.9289              | 0.043 |
| MS3      | GP:M14131_1       | IDNPESAKVS*DAEEEEYAVEK              | 0.9366              | 0.058 |
| MS2      | UPTR:Q8IME2_DROME | IEDPLQFVPAGT*NPR                    | 0.9741              | 0.121 |
| MS2      | UPTR:Q9VVG9_DROME | IEVKS*DDDIDEVPVEK                   | 0.9981              | 0.183 |
| MS3      | UPTR:Q9VVG9_DROME | IEVKS*DDDIDEVPVEK                   | 0.9994              | 0.264 |
| MS2      | AP1_DROME         | IFAPLVINS*PDLSSK                    | 0.9833              | 0.154 |
| MS3      | GP:Y12573_1       | IFAPLVINS*PDLSSK                    | 0.9587              | 0.156 |
| MS2      | UPTR:Q7KT11_DROME | IFSAGLDVTDPEPLS*PK                  | 0.9677              | 0.177 |
| MS2      | GN:X62637_1       | IFVGGLTTEIS*DEEIK                   | 0.9206              | 0.156 |
| MS3      | SQD_DROME         | IFVGGLTTEIS*DEEIK                   | 0.9086              | 0.036 |
| MS2      | LASP1_DROME       | IGS*VSDIDPANGIYGLTAAEQAHQQQK        | 0.9839              | 0.202 |
| MS3      | GP:AE003526_24    | IGS*VSDIDPANGIYGLTAAEQAHQQQK        | 0.9825              | 0.131 |
| MS2      | UPTR:Q9U8B5_DROME | IHDNES*DGEEQHVDEGLVR                | 0.9998              | 0.357 |
| MS3      | UPTR:Q9U8B5_DROME | IHDNES*DGEEQHVDEGLVR                | 0.9987              | 0.353 |
| MS2      | UPTR:Q86BB5_DROME | IIELSLS*PIPIHRPK                    | 0.9278              | 0.059 |
| MS3      | UPTR:Q86BB5_DROME | IIELSLS*PIPIHRPK                    | 0.9267              | 0.059 |
| MS2      | UPTR:Q94885_DROME | IILNDFS*LTTLK                       | 0.9834              | 0.143 |
| MS3      | UPTR:Q94885_DROME | IILNDFS*LTTLK                       | 0.9244              | 0.114 |
| MS2      | UNK_DROME         | IISPGFGDGLSIS*PSVR                  | 0.9942              | 0.111 |
| MS3      | UNK_DROME         | IISPGFGDGLSIS*PSVR                  | 0.9952              | 0.108 |
| MS2      | UPTR:Q9VWD4_DROME | IKFS*DAEEEEASKPVQK                  | 0.927               | 0.292 |
| MS3      | UPTR:Q9VWD4_DROME | IKFS*DAEEEEASKPVQK                  | 0.9153              | 0.371 |

| MS Level | Protein           | Sequence                            | Peptide probability | dCn   |
|----------|-------------------|-------------------------------------|---------------------|-------|
| MS2      | UPTR:Q8MRM6_DROME | ILEETSAPPSRPLS*LEESQFESPPLTQEK      | 0.9708              | 0.104 |
| MS3      | UPTR:Q8MRM6_DROME | ILEETSAPPSRPLS*LEESQFESPPLTQEK      | 0.9955              | 0.133 |
| MS2      | UPTR:Q8MRM6_DROME | ILEETSAPPSRPLSLEES*QFESPPLTQEK      | 0.9754              | 0.184 |
| MS3      | UPTR:Q8MRM6_DROME | ILEETSAPPSRPLSLEES*QFESPPLTQEK      | 0.9016              | 0.137 |
| MS2      | GP:AY122137_1     | ILGQPCS*VESVTNGK                    | 0.9452              | 0.206 |
| MS3      | GP:AY122137_1     | ILGQPCS*VESVTNGK                    | 0.9281              | 0.113 |
| MS2      | UPTR:Q9VU84_DROME | INVFNQNPQDAPVPS*PPR                 | 1                   | 0.448 |
| MS3      | UPTR:Q9VU84_DROME | INVFNQNPQDAPVPS*PPR                 | 0.9913              | 0.244 |
| MS2      | UPTR:O76755_DROME | IPES*PCDQIDEPK                      | 0.9998              | 0.26  |
| MS3      | UPTR:O76755_DROME | IPES*PCDQIDEPK                      | 0.9998              | 0.254 |
| MS2      | UPTR:Q9VWS3_DROME | IPLSQVDEQPAAGS*LER                  | 1                   | 0.369 |
| MS3      | UPTR:Q9VWS3_DROME | IPLSQVDEQPAAGS*LER                  | 0.9998              | 0.377 |
| MS2      | UPTR:Q8MSU7_DROME | IPSPSRPS*IQANSFQDPR                 | 0.9887              | 0.101 |
| MS3      | UPTR:Q8MSU7_DROME | IPSPSRPS*IQANSFQDPR                 | 0.983               | 0.086 |
| MS2      | UPTR:Q9V3W9_DROME | IPSTLDNVDLFS*PDLEVATSAQR            | 0.9981              | 0.209 |
| MS3      | UPTR:Q9XZE0_DROME | IPSTLDNVDLFS*PDLEVATSAQR            | 0.998               | 0.214 |
| MS2      | MLC2_DROME        | IQLS*QVGECLR                        | 0.9986              | 0.218 |
| MS3      | MLC2_DROME        | IQLS*QVGECLR                        | 0.9746              | 0.173 |
| MS2      | GP:U23420_1       | IS*ILGLAANSAGVTR                    | 0.9975              | 0.281 |
| MS3      | GP:U23420_1       | IS*ILGLAANSAGVTR                    | 0.9993              | 0.311 |
| MS2      | UPTR:O16125_DROME | IS*TAGAAAAAAPSPAPK                  | 0.986               | 0.036 |
| MS3      | UPTR:O16125_DROME | IS*TAGAAAAAAPSPAPK                  | 0.9846              | 0.038 |
| MS2      | UPTR:Q9W1K9_DROME | ISEEQQADVLAS*PR                     | 1                   | 0.382 |
| MS3      | UPTR:Q9W1K9_DROME | ISEEQQADVLAS*PR                     | 1                   | 0.391 |
| MS2      | UPTR:Q8T9E1_DROME | ISETS*LFAELVK                       | 0.9886              | 0.134 |
| MS3      | UPTR:Q8T9E1_DROME | ISETS*LFAELVK                       | 0.9686              | 0.101 |
| MS2      | UPTR:Q9W4X7_DROME | ISNLS*ES*MTEADLEELVK                | 0.942               | 0.114 |
| MS3      | UPTR:Q9W4X7_DROME | ISNLS*ES*MTEADLEELVK                | 0.9542              | 0.122 |
| MS2      | UPTR:Q86NR5_DROME | ISS*PTNQLAQWFPELLAK                 | 0.9875              | 0.008 |
| MS3      | UPTR:Q86NR5_DROME | ISS*PTNQLAQWFPELLAK                 | 0.9586              | 0.115 |
| MS3      | UPTR:Q86NR5_DROME | ISSPT*NQLAQWFPELLAK                 | 0.9099              | 0.084 |
| MS2      | UPTR:Q9VMJ7_DROME | IVEDNFS*NDEDEPR                     | 0.999               | 0.267 |
| MS3      | UPTR:Q9VMJ7_DROME | IVEDNFS*NDEDEPR                     | 0.9986              | 0.194 |
| MS2      | UPTR:O46090_DROME | IVSDLTTGDPEDS*ECEDLLPQQPLSIPK       | 0.9349              | 0.211 |
| MS3      | UPTR:O46090_DROME | IVSDLTTGDPEDS*ECEDLLPQQPLSIPK       | 0.9944              | 0.211 |
| MS2      | GP:AY058497_1     | IY*ATPIAK                           | 0.9088              | 0.166 |
| MS3      | GP:AY058497_1     | IY*ATPIAK                           | 0.996               | 0.289 |
| MS2      | ATU_DROME         | KAPAAADIFGDADDIS*DDEDEAGPAAR        | 0.9562              | 0.076 |
| MS3      | ATU_DROME         | KAPAAADIFGDADDIS*DDEDEAGPAAR        | 0.9996              | 0.228 |
| MS2      | IF2B_DROME        | KEDPQDEAS*AEGGAAAEEDNLDLESFGK       | 0.995               | 0.273 |
| MS3      | IF2B_DROME        | KEDPQDEAS*AEGGAAAEEDNLDLESFGK       | 0.9993              | 0.277 |
| MS2      | HMGD_DROME        | KEES*DEDDDDDES*E                    | 1                   | 0.408 |
| MS3      | HMGD_DROME        | KEES*DEDDDDDES*E                    | 0.9995              | 0.288 |
| MS2      | HMGD_DROME        | KEES*DEDDDDDESE                     | 1                   | 0.416 |
| MS3      | HMGD_DROME        | KEES*DEDDDDDESE                     | 0.9943              | 0.244 |
| MS2      | UPTR:Q9V426_DROME | KENDS*EEELEYDPALYPQR                | 1                   | 0.266 |
| MS3      | UPTR:Q9V426_DROME | KENDS*EEELEYDPALYPQR                | 0.9958              | 0.161 |
| MS2      | GP:AY069224_1     | KES*DDEDEPNTSQELSADER               | 0.9359              | 0.181 |
| MS3      | GP:AY069224_1     | KES*DDEDEPNTSQELSADER               | 0.9245              | 0.181 |
| MS2      | UPTR:Q8ML61_DROME | KES*LLHSVGGNLLIPSFQR                | 0.9223              | 0.089 |
| MS3      | UPTR:Q8ML61_DROME | KES*LLHSVGGNLLIPSFQR                | 0.9083              | 0.089 |
| MS2      | UPTR:Q6NLK4_DROME | KES*NSEDELEYDPSLYPQR                | 0.9903              | 0.117 |
| MS3      | UPTR:Q6NLK4_DROME | KES*NSEDELEYDPSLYPQR                | 0.9716              | 0.118 |
| MS2      | UPTR:O16043_DROME | KESSEAVLPAVENGSEEVTVNGDST*DAPAIEAVK | 0.9834              | 0.009 |
| MS3      | UPTR:O16043_DROME | KESSEAVLPAVENGSEEVTVNGDST*DAPAIEAVK | 0.9731              | 0.046 |
| MS2      | UPTR:Q9VVR0_DROME | KIEEAELPS*DGD                       | 0.9996              | 0.309 |
| MS3      | UPTR:Q9VVR0_DROME | KIEEAELPS*DGD                       | 0.999               | 0.309 |
| MS2      | UPTR:Q8I0K6_DROME | KIS*LPVADPFLEK                      | 0.9415              | 0.137 |
| MS3      | UPTR:Q8I0K6_DROME | KIS*LPVADPFLEK                      | 0.9973              | 0.33  |
| MS2      | UPTR:Q9NAX2_DROME | KLDLSLMFNQS*DDETEQR                 | 0.9653              | 0.087 |
| MS3      | UPTR:Q9NAX2_DROME | KLDLSLMFNQS*DDETEQR                 | 0.9602              | 0.094 |

| MS Level | Protein           | Sequence                             | Peptide probability | dCn   |
|----------|-------------------|--------------------------------------|---------------------|-------|
| MS2      | UPTR:Q7KRF7_DROME | KLS*NTSVGSYPVEPAVAVR                 | 0.9339              | 0.141 |
| MS3      | UPTR:Q8T0T0_DROME | KLS*NTSVGSYPVEPAVAVR                 | 0.9215              | 0.149 |
| MS2      | UPTR:Q7KR54_DROME | KLS*VNTIPGIEEVNIIK                   | 0.9933              | 0.296 |
| MS3      | UPTR:Q7KR54_DROME | KLS*VNTIPGIEEVNIIK                   | 0.9177              | 0.288 |
| MS2      | UPTR:Q9I7K6_DROME | KPEDPSSEAEALCS*PAK                   | 0.9809              | 0.303 |
| MS3      | UPTR:Q9I7K6_DROME | KPEDPSSEAEALCS*PAK                   | 0.9835              | 0.3   |
| MS2      | UPTR:Q9I7K6_DROME | KPEDPSSEAEALCS*PAKR                  | 0.9985              | 0.222 |
| MS3      | UPTR:Q9I7K6_DROME | KPEDPSSEAEALCS*PAKR                  | 0.9975              | 0.316 |
| MS2      | UPTR:Q8T4A1_DROME | KPGMASSAS*SSNLTLTGDPDQINGNAAEQEDLAQR | 0.9627              | 0.041 |
| MS3      | UPTR:Q8T4A1_DROME | KPGMASSAS*SSNLTLTGDPDQINGNAAEQEDLAQR | 0.9388              | 0.003 |
| MS2      | UPTR:Q9NL57_DROME | KPLGPNNSNQASMTGAAASGS*LPRPR          | 0.9755              | 0.207 |
| MS2      | UPTR:Q9VLK2_DROME | KPLILAPPES*PVPPK                     | 0.9995              | 0.31  |
| MS3      | UPTR:Q9VLK2_DROME | KPLILAPPES*PVPPK                     | 0.9995              | 0.323 |
| MS2      | UPTR:Q9VV79_DROME | KPLS*PLADHPQITISR                    | 0.9853              | 0.117 |
| MS3      | UPTR:Q9VV79_DROME | KPLS*PLADHPQITISR                    | 0.9987              | 0.199 |
| MS2      | UPTR:Q9NFR7_DROME | KPLVQQNS*LFVDPTNPLGLK                | 0.9294              | 0.086 |
| MS3      | UPTR:Q9NFR7_DROME | KPLVQQNS*LFVDPTNPLGLK                | 0.9995              | 0.216 |
| MS2      | UPTR:Q6NLK7_DROME | KPS*VSPSPGR                          | 0.9805              | 0.267 |
| MS3      | UPTR:Q6NLK7_DROME | KPS*VSPSPGR                          | 0.9174              | 0.222 |
| MS2      | GP:AE003784_30    | KPVRPVNS*DGENWDDDDAENSAPK            | 0.9997              | 0.44  |
| MS3      | ARS2_DROME        | KPVRPVNS*DGENWDDDDAENSAPK            | 0.9998              | 0.29  |
| MS2      | UPTR:Q9VCC0_DROME | KQEES*DEEFFDLDDIK                    | 0.974               | 0.209 |
| MS3      | UPTR:Q9VCC0_DROME | KQEES*DEEFFDLDDIK                    | 0.9515              | 0.254 |
| MS2      | UPTR:Q6XJ14_DROYA | KQGGLGS*MDIPLLADK                    | 0.9993              | 0.318 |
| MS3      | UPTR:Q6XJ14_DROYA | KQGGLGS*MDIPLLADK                    | 0.9946              | 0.315 |
| MS2      | UPTR:Q9VSH4_DROME | KS*PEPVVAEAAEAPSSK                   | 1                   | 0.396 |
| MS3      | UPTR:Q9VSH4_DROME | KS*PEPVVAEAAEAPSSK                   | 1                   | 0.414 |
| MS2      | UPTR:Q9VP17_DROME | KSS*SDTVIEPLIK                       | 0.9906              | 0.085 |
| MS3      | UPTR:Q9VP17_DROME | KSS*SDTVIEPLIK                       | 0.9401              | 0.08  |
| MS2      | SUI1_DROME        | KT*LTTVQGLSAEYDLK                    | 0.9973              | 0.186 |
| MS3      | SUI1_DROME        | KT*LTTVQGLSAEYDLK                    | 0.9958              | 0.209 |
| MS2      | UPTR:Q9VUB8_DROME | KTS*IIQPCNK                          | 0.9061              | 0.221 |
| MS3      | UPTR:Q9VUB8_DROME | KTS*IIQPCNK                          | 0.9955              | 0.18  |
| MS2      | UPTR:Q9VI58_DROME | KTS*LPGSTAPNIAAPVTK                  | 0.9566              | 0.325 |
| MS3      | UPTR:Q9VI58_DROME | KTS*LPGSTAPNIAAPVTK                  | 0.9512              | 0.32  |
| MS2      | UPTR:Q8IGS1_DROME | LADFGVAGQLTNT*TSK                    | 0.9971              | 0.054 |
| MS3      | UPTR:Q8IGS1_DROME | LADFGVAGQLTNT*TSK                    | 0.9972              | 0.061 |
| MS2      | UPTR:Q9W2U7_DROME | LAFS*DDESTPEEHQGGQK                  | 0.9626              | 0.143 |
| MS3      | UPTR:Q9W2U7_DROME | LAFS*DDESTPEEHQGGQK                  | 0.9971              | 0.188 |
| MS2      | UPTR:Q9W000_DROME | LAGAASLPEAGDQGT*LDK                  | 0.994               | 0.187 |
| MS3      | UPTR:Q9W000_DROME | LAGAASLPEAGDQGT*LDK                  | 0.9947              | 0.187 |
| MS2      | UPTR:Q9VU43_DROME | LALLLPGAS*GAGVINEDLEK                | 0.9922              | 0.285 |
| MS3      | UPTR:Q9VU43_DROME | LALLLPGAS*GAGVINEDLEK                | 0.9926              | 0.285 |
| MS2      | GP:AJ272505_1     | LAPADTT*AVSTAQIELK                   | 0.9932              | 0.057 |
| MS3      | SH3BG_DROME       | LAPADTT*AVSTAQIELK                   | 0.9969              | 0.061 |
| MS2      | UPTR:Q9VBU7_DROME | LAS*GEGQGNVLSIFR                     | 0.9951              | 0.42  |
| MS3      | UPTR:Q9VBU7_DROME | LAS*GEGQGNVLSIFR                     | 0.999               | 0.485 |
| MS2      | GP:AF017647_1     | LAS*MDVDPLSLEEAVQEPNAQGR             | 0.946               | 0.134 |
| MS3      | GP:AF017647_1     | LAS*MDVDPLSLEEAVQEPNAQGR             | 0.9948              | 0.234 |
| MS2      | UPTR:Q8IGX8_DROME | LAS*VDDIPK                           | 0.987               | 0.193 |
| MS3      | MODU_DROME        | LAS*VDDIPK                           | 0.9883              | 0.195 |
| MS2      | UPTR:O61444_DROME | LCDFGISGQLVDS*IAK                    | 0.9951              | 0.381 |
| MS3      | UPTR:O61444_DROME | LCDFGISGQLVDS*IAK                    | 0.9994              | 0.379 |
| MS2      | UPTR:Q7K2Q3_DROME | LDS*MLDTPKPR                         | 0.9088              | 0.135 |
| MS3      | UPTR:Q7K2Q3_DROME | LDS*MLDTPKPR                         | 0.9096              | 0.13  |
| MS2      | UPTR:Q6NPA6_DROME | LDT*FCGSPPYAAPELFGQK                 | 0.9737              | 0.149 |
| MS3      | UPTR:Q6NPA6_DROME | LDT*FCGSPPYAAPELFGQK                 | 0.9995              | 0.326 |
| MS2      | UPTR:Q8MYR3_DROME | LEEQTEADS*PPILTSAMATK                | 0.9957              | 0.394 |
| MS2      | TCTP_DROME        | LEGANAS*AEAEDEGTDITSESGVDVVLNHR      | 0.9992              | 0.184 |
| MS3      | TCTP_DROME        | LEGANAS*AEAEDEGTDITSESGVDVVLNHR      | 0.9994              | 0.245 |
| MS2      | UPTR:Q9VNA2_DROME | LEGLRPGS*PKPGHIER                    | 1                   | 0.308 |



| MS Level | Protein           | Sequence                                 | Peptide probability | dCn   |
|----------|-------------------|------------------------------------------|---------------------|-------|
| MS3      | UPTR:Q7KNC5_DROME | LEGLRPGS*PKPGHIER                        | 1                   | 0.279 |
| MS2      | UPTR:Q8IQT4_DROME | LELS*EDDLPVAR                            | 0.9955              | 0.246 |
| MS3      | UPTR:Q8IQT4_DROME | LELS*EDDLPVAR                            | 0.9101              | 0.112 |
| MS2      | UPTR:Q8IGK0_DROME | LEPGTLELS*PK                             | 0.9158              | 0.179 |
| MS3      | UPTR:Q8IGK0_DROME | LEPGTLELS*PK                             | 0.928               | 0.179 |
| MS3      | UPTR:Q8INM3_DROME | LES*FEEDVEDHGNEEENEHEEDK                 | 0.9035              | 0.245 |
| MS2      | UPTR:Q9V6Q6_DROME | LES*PERLDTKPAELLK                        | 0.9948              | 0.218 |
| MS3      | UPTR:Q9V6Q6_DROME | LES*PERLDTKPAELLK                        | 0.9441              | 0.216 |
| MS3      | UPTR:Q7KRQ4_DROME | LFATGS*NDMTELNQSSK                       | 0.9984              | 0.314 |
| MS2      | UPTR:Q960K6_DROME | LFDDS*DDDDDDLFAR                         | 0.9977              | 0.175 |
| MS3      | UPTR:Q960K6_DROME | LFDDS*DDDDDDLFAR                         | 0.9994              | 0.283 |
| MS2      | UPTR:Q8IGZ9_DROME | LFGEPTRPIT*PGK                           | 0.9882              | 0.417 |
| MS3      | UPTR:Q8IGZ9_DROME | LFGEPTRPIT*PGK                           | 0.949               | 0.44  |
| MS2      | MCM2_DROME        | LGFGQS*DEEDDVGPR                         | 0.9932              | 0.316 |
| MS3      | MCM2_DROME        | LGFGQS*DEEDDVGPR                         | 0.9845              | 0.283 |
| MS2      | UPTR:Q9VCI7_DROME | LGGAVLRPAVLANSSSGNSNSTS*PSAGEDSALLNNPFLR | 0.994               | 0.02  |
| MS3      | UPTR:Q9VCI7_DROME | LGGAVLRPAVLANSSSGNSNSTS*PSAGEDSALLNNPFLR | 0.9961              | 0.03  |
| MS2      | CDC37_DROME       | LGPGLDPADVFESE*LPDELK                    | 0.9999              | 0.367 |
| MS3      | CDC37_DROME       | LGPGLDPADVFESE*LPDELK                    | 0.9999              | 0.393 |
| MS2      | UPTR:Q8SX68_DROME | LGS*ITGSSAIAAATAATTAAGTAK                | 0.9967              | 0.035 |
| MS3      | UPTR:Q8SX68_DROME | LGS*ITGSSAIAAATAATTAAGTAK                | 0.9872              | 0.035 |
| MS2      | UPTR:Q9V4M0_DROME | LGS*PVANLVTEAPTVPVALSPGEEANQEASAR        | 0.994               | 0.08  |
| MS3      | UPTR:Q9V4M0_DROME | LGS*PVANLVTEAPTVPVALSPGEEANQEASAR        | 0.9928              | 0.08  |
| MS2      | UPTR:Q9V4M0_DROME | LGSPVANLVTEAPTVPVALS*PGEAANQEASAR        | 0.9906              | 0.141 |
| MS3      | UPTR:Q9V4M0_DROME | LGSPVANLVTEAPTVPVALS*PGEAANQEASAR        | 0.9901              | 0.215 |
| MS2      | GP:Z46894_1       | LHDIDS*EDDEDDQMTIENLLNSK                 | 0.9955              | 0.411 |
| MS3      | GP:Z46894_1       | LHDIDS*EDDEDDQMTIENLLNSK                 | 0.994               | 0.359 |
| MS2      | UPTR:Q8I092_DROME | LIDAEDIPMNS*PPAEPFDEETK                  | 0.9988              | 0.387 |
| MS3      | UPTR:Q9V468_DROME | LIDAEDIPMNS*PPAEPFDEETK                  | 0.9677              | 0.159 |
| MS2      | UPTR:Q7KSN8_DROME | LIFEDVPIQKES*DGEDPEEKPEEK                | 0.9401              | 0.327 |
| MS3      | UPTR:Q8MQK8_DROME | LIFEDVPIQKES*DGEDPEEKPEEK                | 0.9804              | 0.299 |
| MS2      | UPTR:Q95TR2_DROME | LIFS*GDEDEEEQDVPTTR                      | 0.999               | 0.381 |
| MS3      | UPTR:Q95TR2_DROME | LIFS*GDEDEEEQDVPTTR                      | 0.9992              | 0.327 |
| MS2      | UPTR:Q7KR73_DROME | LIS*PDECQVIVDGEQQSQTVSTLLK               | 0.9991              | 0.32  |
| MS3      | UPTR:Q7KR73_DROME | LIS*PDECQVIVDGEQQSQTVSTLLK               | 0.9902              | 0.329 |
| MS2      | UPTR:Q6AWK1_DROME | LKEFPIQY*IPLDSHIQF                       | 0.9289              | 0.202 |
| MS3      | UPTR:Q6AWK1_DROME | LKEFPIQY*IPLDSHIQF                       | 0.9974              | 0.206 |
| MS2      | UPTR:Q9VVA0_DROME | LLAAKPPVLHHNSHSPNASLQLPS*PIITR           | 0.9881              | 0.097 |
| MS3      | UPTR:Q9VVA0_DROME | LLAAKPPVLHHNSHSPNASLQLPS*PIITR           | 0.9814              | 0.102 |
| MS2      | UPTR:O44368_DROME | LLDLPTTLETADQACS*PIIHLSCIPQSR            | 0.994               | 0.294 |
| MS3      | UPTR:O44368_DROME | LLDLPTTLETADQACS*PIIHLSCIPQSR            | 0.9933              | 0.294 |
| MS2      | UPTR:Q9VHC8_DROME | LLGDENDELKLS*PVSTPTTVAIPDLLAEK           | 0.9953              | 0.15  |
| MS3      | UPTR:Q9VHC8_DROME | LLGDENDELKLS*PVSTPTTVAIPDLLAEK           | 0.9557              | 0.2   |
| MS2      | UPTR:Q9NFR7_DROME | LLGMPDSEPS*PTEEEAR                       | 0.9214              | 0.042 |
| MS2      | UPTR:Q9W5W9_DROME | LLGSIS*PEPSTPAPR                         | 0.9974              | 0.188 |
| MS3      | UPTR:Q9W5W9_DROME | LLGSIS*PEPSTPAPR                         | 0.9692              | 0.36  |
| MS2      | UPTR:Q95TF8_DROME | LLGTIGS*ESETNTAK                         | 0.9982              | 0.139 |
| MS3      | UPTR:Q95TF8_DROME | LLGTIGS*ESETNTAK                         | 0.982               | 0.114 |
| MS3      | UPTR:Q9V3H3_DROME | LLIDTNSTTASTHSAS*PSSFLPIVPPR             | 0.9297              | 0.086 |
| MS2      | MA205_DROME       | LLPDTT*DEQLLTSALEEK                      | 0.9047              | 0.019 |
| MS3      | MA205_DROME       | LLPDTT*DEQLLTSALEEK                      | 0.9033              | 0.019 |
| MS2      | MA205_DROME       | LLPDTTDEQLLTS*ALEEK                      | 0.9006              | 0.358 |
| MS3      | MA205_DROME       | LLPDTTDEQLLTS*ALEEK                      | 0.9648              | 0.06  |
| MS2      | UPTR:Q9VW85_DROME | LLPSVS*TEETSESGVAPGK                     | 0.9973              | 0.041 |
| MS3      | UPTR:Q9VW85_DROME | LLPSVS*TEETSESGVAPGK                     | 0.9898              | 0.041 |
| MS2      | UPTR:Q9VW85_DROME | LLPSVST*EETSESGVAPGK                     | 0.9973              | 0.121 |
| MS3      | UPTR:Q9VW85_DROME | LLPSVST*EETSESGVAPGK                     | 0.9841              | 0.082 |
| MS2      | 41_DROME          | LLQDPLLS*PTTR                            | 0.9886              | 0.061 |
| MS3      | GP:L27467_1       | LLQDPLLS*PTTR                            | 0.9768              | 0.18  |
| MS2      | MA205_DROME       | LLVPGSSS*TTTTSSLR                        | 0.9307              | 0.115 |
| MS3      | MA205_DROME       | LLVPGSSS*TTTTSSLR                        | 0.9408              | 0.115 |

| MS Level | Protein           | Sequence                           | Peptide probability | dCn   |
|----------|-------------------|------------------------------------|---------------------|-------|
| MS2      | UPTR:Q6AWF3_DROME | LNEELASHQQQQNQQLRPIS*PDIR          | 0.9975              | 0.302 |
| MS3      | UPTR:Q6AWF3_DROME | LNEELASHQQQQNQQLRPIS*PDIR          | 0.9664              | 0.136 |
| MS2      | UPTR:Q86BS3_DROME | LNNTDSSLEGSGLNDS*MDLEDEEDLPSHTVK   | 0.973               | 0.127 |
| MS3      | UPTR:Q86BS3_DROME | LNNTDSSLEGSGLNDS*MDLEDEEDLPSHTVK   | 0.9671              | 0.125 |
| MS2      | UPTR:Q9NJH5_DROME | LNRPPEAIS*PVSPGLNGTVVLEEQTLSAK     | 0.9882              | 0.351 |
| MS3      | UPTR:Q9NJH5_DROME | LNRPPEAIS*PVSPGLNGTVVLEEQTLSAK     | 0.9862              | 0.09  |
| MS2      | UPTR:Q9NJH5_DROME | LNRPPEAIS*PVSPGLNGTVVLEEQTLSAK     | 0.9274              | 0.034 |
| MS3      | UPTR:Q9NJH5_DROME | LNRPPEAIS*PVSPGLNGTVVLEEQTLSAK     | 0.9411              | 0.016 |
| MS2      | UPTR:Q9VNA2_DROME | LNS*SFIYPGQQLLPDK                  | 0.9384              | 0.033 |
| MS2      | UPTR:Q9V3H3_DROME | LNS*VTTGNGLNNGNTDLFGSDPFELNNGPNIFK | 0.9729              | 0.028 |
| MS3      | UPTR:Q9V3H3_DROME | LNS*VTTGNGLNNGNTDLFGSDPFELNNGPNIFK | 0.9497              | 0.13  |
| MS2      | UPTR:Q9V3H3_DROME | LNSVTTGNGLNNGNT*DLFGSDPFELNNGPNIFK | 0.9203              | 0.201 |
| MS2      | UPTR:Q9VTU3_DROME | LPGPAINPIVDNSDEPQPS*LSDLHDFEPK     | 0.9617              | 0.024 |
| MS3      | UPTR:Q9VTU3_DROME | LPGPAINPIVDNSDEPQPS*LSDLHDFEPK     | 0.9729              | 0.008 |
| MS2      | UPTR:Q9VTU3_DROME | LPGPAINPIVDNSDEPQPS*DLHDFEPK       | 0.968               | 0.34  |
| MS3      | UPTR:Q9VTU3_DROME | LPGPAINPIVDNSDEPQPS*DLHDFEPK       | 0.9896              | 0.023 |
| MS2      | UPTR:Q9W3H5_DROME | LPPLAHS*ISIDPSR                    | 0.9731              | 0.095 |
| MS3      | UPTR:Q9W3H5_DROME | LPPLAHS*ISIDPSR                    | 0.9695              | 0.342 |
| MS2      | UPTR:Q9W3H5_DROME | LPPLAHS*ISIDPSR                    | 0.9996              | 0.283 |
| MS3      | UPTR:Q9W3H5_DROME | LPPLAHS*ISIDPSR                    | 0.9977              | 0.186 |
| MS2      | UPTR:Q5BHU7_DROME | LQCLAGVMVTAS*HNP                   | 0.9854              | 0.038 |
| MS3      | UPTR:Q5BHU7_DROME | LQCLAGVMVTAS*HNP                   | 0.9632              | 0.027 |
| MS3      | UPTR:Q86NT2_DROME | LQGVLCAS*EER                       | 0.9756              | 0.1   |
| MS2      | UPTR:Q9VYL6_DROME | LQHAES*LEDLASSGVAK                 | 0.9992              | 0.335 |
| MS3      | UPTR:Q95S42_DROME | LQHAES*LEDLASSGVAK                 | 0.9859              | 0.204 |
| MS2      | UPTR:Q6IHD1_DROME | LQIVEGGDS*AGEGGFGGGEVLWAENV        | 0.9859              | 0.341 |
| MS2      | UPTR:Q8ML25_DROME | LQS*GGEGVGITSEQLAK                 | 0.9997              | 0.387 |
| MS3      | UPTR:Q8ML25_DROME | LQS*GGEGVGITSEQLAK                 | 0.9981              | 0.201 |
| MS2      | UPTR:Q9Y128_DROME | LQSQIS*QLVNVPHAEVAEGEEAR           | 0.9211              | 0.063 |
| MS2      | UPTR:Q8MQL2_DROPS | LQY*FDLDVTNKPPLLNR                 | 0.9792              | 0.067 |
| MS3      | UPTR:Q8MQL2_DROPS | LQY*FDLDVTNKPPLLNR                 | 0.9703              | 0.067 |
| MS2      | GCP2_DROME        | LS*LTQSQDFPTSTPVNCK                | 0.989               | 0.05  |
| MS3      | GCP2_DROME        | LS*LTQSQDFPTSTPVNCK                | 0.9845              | 0.012 |
| MS2      | UPTR:Q7KQ11_DROME | LS*SAPTPTSPNPFVLSLIDK              | 0.9702              | 0.034 |
| MS3      | UPTR:Q7KQ11_DROME | LS*SAPTPTSPNPFVLSLIDK              | 0.9685              | 0.034 |
| MS2      | UPTR:Q6NP55_DROME | LS*VSTIPENPFEDQSSTIAR              | 0.9312              | 0.063 |
| MS3      | UPTR:Q6NP55_DROME | LS*VSTIPENPFEDQSSTIAR              | 0.9076              | 0.079 |
| MS2      | UPTR:Q4V5P0_DROME | LS*VVVKPMSSFPRK                    | 0.9152              | 0.298 |
| MS2      | UPTR:Q8SXM2_DROME | LSQVSSVSS*MELHK                    | 0.9887              | 0.155 |
| MS2      | UPTR:Q7KQ11_DROME | LSS*APTPTSPNPFVLSLIDK              | 0.9022              | 0.005 |
| MS3      | UPTR:Q7KQ11_DROME | LSS*APTPTSPNPFVLSLIDK              | 0.9397              | 0     |
| MS2      | UPTR:Q86B44_DROME | LSTANEGGVAAGLGALDSPYLIDS*DDEDEQK   | 0.9989              | 0.093 |
| MS3      | UPTR:Q86B44_DROME | LSTANEGGVAAGLGALDSPYLIDS*DDEDEQK   | 0.9985              | 0.084 |
| MS2      | UPTR:O16125_DROME | LT*SIIDTERPPDLVK                   | 0.9084              | 0.018 |
| MS2      | UPTR:Q9VE73_DROME | LT*SLTEDVAAPVEDAPFR                | 0.9196              | 0     |
| MS3      | UPTR:Q9VE73_DROME | LT*SLTEDVAAPVEDAPFR                | 0.9282              | 0     |
| MS2      | ABL_DROME         | LTII*ATPIAK                        | 0.9878              | 0.086 |
| MS3      | ABL_DROME         | LTII*ATPIAK                        | 0.9806              | 0.094 |
| MS2      | UPTR:Q9VE73_DROME | LTS*LTEDVAAPVEDAPFR                | 0.9738              | 0.001 |
| MS3      | UPTR:Q9VE73_DROME | LTS*LTEDVAAPVEDAPFR                | 0.9919              | 0.034 |
| MS2      | UPTR:Q7YU85_DROME | LTTAVS*HDLADGLAASK                 | 0.9762              | 0.242 |
| MS3      | UPTR:Q9VA36_DROME | LTTAVS*HDLADGLAASK                 | 0.9949              | 0.178 |
| MS3      | TYSY_DROME        | MALPPCHCLAQFY*VS*EK                | 0.9145              | 0.076 |
| MS2      | UPTR:Q9V8K6_DROME | MDVDEEDS*AAPK                      | 0.9821              | 0.204 |
| MS3      | UPTR:Q9V8K6_DROME | MDVDEEDS*AAPK                      | 0.9851              | 0.232 |
| MS3      | UPTR:Q9VD32_DROME | MGVT*CLY*VLVLVANVLANGIVVQQALIR     | 0.9585              | 0.298 |
| MS3      | UPTR:Q8SXG3_DROME | MNDS*FGDFNATQTAPTGAASNQK           | 0.9978              | 0.31  |
| MS2      | UPTR:Q9V346_DROME | MS*SPDGLDQAAAESLGNFVR              | 0.9896              | 0.019 |
| MS3      | UPTR:Q9V346_DROME | MS*SPDGLDQAAAESLGNFVR              | 0.9839              | 0.426 |
| MS3      | UPTR:Q9V346_DROME | MSS*PDGLDQAAAESLGNFVR              | 0.9787              | 0.002 |
| MS3      | UPTR:Q6XHM1_DROYA | MSYKIEPLPDS*Y*AGLGEGPHWDVAR        | 0.9845              | 0.156 |

| MS Level | Protein           | Sequence                                | Peptide probability | dCn   |
|----------|-------------------|-----------------------------------------|---------------------|-------|
| MS2      | UPTR:Q9VYV4_DROME | NAGGVGVGVGEKS*PDLK                      | 0.9999              | 0.299 |
| MS3      | UPTR:Q9VYV4_DROME | NAGGVGVGVGEKS*PDLK                      | 0.999               | 0.351 |
| MS2      | UPTR:Q9VHU6_DROME | NANDLPDS*FFDLTVNDLK                     | 0.995               | 0.193 |
| MS3      | UPTR:Q9VHU6_DROME | NANDLPDS*FFDLTVNDLK                     | 0.9763              | 0.279 |
| MS2      | UPTR:Q9NJH7_DROME | NDDS*DEEEVPAK                           | 0.9931              | 0.135 |
| MS3      | UPTR:Q9NJH7_DROME | NDDS*DEEEVPAK                           | 0.9929              | 0.129 |
| MS2      | UPTR:Q9NFT0_DROME | NDNDETDS*PHEAAEIEEPDEEVDEADQETK         | 0.9251              | 0.426 |
| MS3      | UPTR:Q9NFT0_DROME | NDNDETDS*PHEAAEIEEPDEEVDEADQETK         | 0.9165              | 0.41  |
| MS2      | UPTR:Q8IMB7_DROME | NEEQAAANFLLSSS*FDD                      | 0.9802              | 0.193 |
| MS3      | UPTR:Q8IMB7_DROME | NEEQAAANFLLSSS*FDD                      | 0.9782              | 0.191 |
| MS3      | UPTR:Q9VZ11_DROME | NFS*DEQLR                               | 0.9195              | 0.011 |
| MS2      | PR2_DROME         | NFTEELQS*IPDIQSLIGK                     | 1                   | 0.414 |
| MS3      | PR2_DROME         | NFTEELQS*IPDIQSLIGK                     | 1                   | 0.414 |
| MS2      | UPTR:Q9U3W1_DROME | NGVQNLS*LDDDEERFEDADE                   | 0.9991              | 0.268 |
| MS3      | UPTR:Q9U3W1_DROME | NGVQNLS*LDDDEERFEDADE                   | 0.9821              | 0.296 |
| MS2      | CDC37_DROME       | NIEIS*DEDDTHPNIDTPSLFR                  | 0.9857              | 0.185 |
| MS3      | CDC37_DROME       | NIEIS*DEDDTHPNIDTPSLFR                  | 0.9996              | 0.26  |
| MS2      | UPTR:Q7K765_DROME | NKQEALNNATAS*DTELELGDK                  | 0.9794              | 0.133 |
| MS2      | UPTR:Q8MQN9_DROME | NLISLTGS*PGGAEK                         | 0.995               | 0.214 |
| MS3      | UPTR:Q8MQN9_DROME | NLISLTGS*PGGAEK                         | 0.9856              | 0.192 |
| MS2      | GP:AY122261_1     | NQDS*DEEDVEAR                           | 0.9543              | 0.116 |
| MS3      | GP:AY122261_1     | NQDS*DEEDVEAR                           | 0.9495              | 0.172 |
| MS2      | UPTR:Q9VGR7_DROME | NQRES*NFGSLMDR                          | 0.9934              | 0.268 |
| MS3      | UPTR:Q9VGR7_DROME | NQRES*NFGSLMDR                          | 0.9889              | 0.221 |
| MS2      | UPTR:Q86B74_DROME | NS*DSGAGTDALADALR                       | 0.9743              | 0.267 |
| MS3      | UPTR:Q9VAT0_DROME | NS*DSGAGTDALADALR                       | 0.992               | 0.132 |
| MS2      | UPTR:Q6NP19_DROME | NS*GGAITHSSEVLQSTAISDRPK                | 0.9884              | 0.166 |
| MS3      | UPTR:Q6NP19_DROME | NS*GGAITHSSEVLQSTAISDRPK                | 0.9998              | 0.429 |
| MS2      | UPTR:Q9I7D3_DROME | NS*LEEGLDK                              | 0.9969              | 0.252 |
| MS3      | UPTR:Q9I7D3_DROME | NS*LEEGLDK                              | 0.9413              | 0.152 |
| MS3      | UPTR:Q8MQV7_DROME | NTDEGAHVDDILDS*DDEVEMDPLR               | 0.9915              | 0.218 |
| MS2      | UPTR:Q9VD68_DROME | NTGKNIS*NVLDELVELLYG                    | 0.9075              | 0.266 |
| MS3      | UPTR:Q9VD68_DROME | NTGKNIS*NVLDELVELLYG                    | 0.9944              | 0.266 |
| MS2      | UPTR:Q86NT4_DROME | NTSS*SGGGASALQTPENVSVPR                 | 0.9997              | 0.014 |
| MS3      | UPTR:Q7KR74_DROME | NTSS*SGGGASALQTPENVSVPR                 | 0.9979              | 0.019 |
| MS2      | SSRP_DROME        | NYKPEAGGDS*DNEK                         | 0.9622              | 0.234 |
| MS2      | UPTR:Q24036_DROME | PAEETPAVAAAEEKS*EEPEK                   | 0.9959              | 0.413 |
| MS3      | UPTR:Q24036_DROME | PAEETPAVAAAEEKS*EEPEK                   | 0.9998              | 0.449 |
| MS3      | UPTR:Q86BS3_DROME | PAPVS*PAPVPQK                           | 0.9734              | 0.386 |
| MS2      | UPTR:Q8IRB9_DROME | PAS*IAGTGMSLEEINK                       | 0.9783              | 0.218 |
| MS2      | GP:AY069224_1     | PDNS*MEVDEVPEPELK                       | 0.9975              | 0.351 |
| MS3      | GP:AY069224_1     | PDNS*MEVDEVPEPELK                       | 0.9981              | 0.353 |
| MS2      | UPTR:Q8IRM4_DROME | PDVT*HVEGEVDPVR                         | 0.9964              | 0.364 |
| MS3      | UPTR:Q8IRM4_DROME | PDVT*HVEGEVDPVR                         | 0.991               | 0.348 |
| MS2      | UPTR:Q8MR29_DROME | PEDDS*DEELVR                            | 0.9869              | 0.268 |
| MS3      | UPTR:Q8MR29_DROME | PEDDS*DEELVR                            | 0.9974              | 0.369 |
| MS3      | UPTR:Q7PLX1_DROME | PGGDDS*DDELQTAVPPSHDIYR                 | 0.9961              | 0.267 |
| MS2      | UPTR:Q8IGK0_DROME | PGTLELS*PK                              | 0.9989              | 0.34  |
| MS3      | UPTR:Q8IGK0_DROME | PGTLELS*PK                              | 0.9292              | 0.269 |
| MS2      | UPTR:Q24050_DROME | PLDGGLPAGAS*PK                          | 0.9921              | 0.361 |
| MS3      | UPTR:Q24050_DROME | PLDGGLPAGAS*PK                          | 0.9876              | 0.368 |
| MS2      | UPTR:Q9VNH5_DROME | PPEGFS*DEEPEER                          | 0.9757              | 0.365 |
| MS3      | UPTR:Q9VNH5_DROME | PPEGFS*DEEPEER                          | 0.9182              | 0.353 |
| MS3      | UPTR:Q8MT44_DROME | PPGS*AAAY*LY*QQNAAAAAAPTQLISLHQIR       | 0.9128              | 0.187 |
| MS2      | UPTR:Q9VA36_DROME | PSNFVQHIEPS*PVLASK                      | 0.995               | 0.278 |
| MS3      | UPTR:Q9VA36_DROME | PSNFVQHIEPS*PVLASK                      | 0.9988              | 0.334 |
| MS3      | UPTR:Q8MLD9_DROME | PSTVAVLLS*DLNQGITSVLSHSEDPDVVLSLGTAAQQV | 0.995               | 0.29  |
| MS2      | UPTR:Q8INW7_DROME | QAAGASTGLS*ELDSLQDLQK                   | 0.9595              | 0.076 |
| MS2      | UPTR:Q24478_DROME | QDS*PSQTPTIIVK                          | 0.973               | 0.184 |
| MS3      | UPTR:Q24478_DROME | QDS*PSQTPTIIVK                          | 0.9775              | 0.183 |
| MS2      | UPTR:Q9VJH2_DROME | QEPEGLNEDFAPES*PATK                     | 0.9693              | 0.136 |



| MS Level | Protein           | Sequence                             | Peptide probability | dCn   |
|----------|-------------------|--------------------------------------|---------------------|-------|
| MS3      | UPTR:Q9VJH2_DROME | QEPEGLNEDFAPES*PATK                  | 0.9226              | 0.166 |
| MS2      | UPTR:Q24478_DROME | QEPTS*PFEQLR                         | 0.9781              | 0.242 |
| MS3      | UPTR:Q24478_DROME | QEPTS*PFEQLR                         | 0.9808              | 0.245 |
| MS2      | UPTR:Q9VXK5_DROME | QGLGLS*DDDNDDEGNAK                   | 0.9987              | 0.277 |
| MS3      | UPTR:Q9VXK5_DROME | QGLGLS*DDDNDDEGNAK                   | 0.9993              | 0.389 |
| MS2      | ARS2_DROME        | QGPQS*PKLDEDEGNENTEPK                | 0.9662              | 0.24  |
| MS3      | GP:AE003784_30    | QGPQS*PKLDEDEGNENTEPK                | 0.983               | 0.241 |
| MS2      | UPTR:Q9VUM1_DROME | QIS*GTASSVAFTPLQGLEIVNPQAAER         | 0.9384              | 0.011 |
| MS3      | UPTR:Q9VUM1_DROME | QIS*GTASSVAFTPLQGLEIVNPQAAER         | 0.9057              | 0.018 |
| MS2      | UPTR:Q9VUM1_DROME | QISGT*ASSVAFTPLQGLEIVNPQAAER         | 0.9062              | 0.017 |
| MS2      | UPTR:Q9VUM1_DROME | QISGTASS*VAFTPLQGLEIVNPQAAER         | 0.9273              | 0.044 |
| MS3      | UPTR:Q9VUM1_DROME | QISGTASS*VAFTPLQGLEIVNPQAAER         | 0.9226              | 0.044 |
| MS2      | UPTR:Q7KVY5_DROME | QLLHGEPNVSY*ICSR                     | 0.9939              | 0.09  |
| MS3      | UPTR:Q7KVY5_DROME | QLLHGEPNVSY*ICSR                     | 0.9968              | 0.088 |
| MS2      | UPTR:Q9VY91_DROME | QNS*GSGGSANQTNGNGAAGAGGAHGASVMPLGINR | 0.9955              | 0.108 |
| MS3      | UPTR:Q9VY91_DROME | QNS*GSGGSANQTNGNGAAGAGGAHGASVMPLGINR | 0.9948              | 0.108 |
| MS2      | UPTR:Q9NI59_DROBU | QNVVLVT*INY*RLGALGLS*LK              | 0.9729              | 0.183 |
| MS2      | UPTR:Q9VZD8_DROME | QPEEGAGGDAGEDDPKPAAGGT*SDDDDLEAAAAK  | 0.9483              | 0.394 |
| MS3      | UPTR:Q9VZD8_DROME | QPEEGAGGDAGEDDPKPAAGGT*SDDDDLEAAAAK  | 0.97                | 0.45  |
| MS2      | UPTR:Q9VZD8_DROME | QPEEGAGGDAGEDDPKPAAGGT*SDDDDLEAAAAK  | 0.9603              | 0.009 |
| MS3      | UPTR:Q9VZD8_DROME | QPEEGAGGDAGEDDPKPAAGGT*SDDDDLEAAAAK  | 0.9689              | 0.007 |
| MS2      | UPTR:Q24593_DROME | QPSAAASGLLTVPS*FSTLQSLR              | 0.9922              | 0.291 |
| MS3      | UPTR:Q24593_DROME | QPSAAASGLLTVPS*FSTLQSLR              | 0.9893              | 0.265 |
| MS2      | UPTR:Q86NT4_DROME | QS*GLGSSNSSNLVEFR                    | 1                   | 0.323 |
| MS3      | UPTR:Q86NT4_DROME | QS*GLGSSNSSNLVEFR                    | 0.9998              | 0.252 |
| MS2      | UPTR:Q7KV69_DROME | QS*QENLVVMR                          | 0.9995              | 0.345 |
| MS3      | UPTR:Q7KV69_DROME | QS*QENLVVMR                          | 0.9923              | 0.204 |
| MS3      | UPTR:Q8T018_DROME | QVSENAAVTDNINQT*IS*GS*VR             | 0.9214              | 0.199 |
| MS3      | UPTR:O76903_DROME | QYNKTSVADGVAAVLNGNLDS*FIY*           | 0.9646              | 0.229 |
| MS2      | UPTR:Q9VUZ8_DROME | RAAIDS*DDDEDYGC                      | 0.9767              | 0.146 |
| MS3      | UPTR:Q9VUZ8_DROME | RAAIDS*DDDEDYGC                      | 0.9984              | 0.405 |
| MS2      | UPTR:Q9VWF0_DROME | RAS*AVAGPTK                          | 0.9633              | 0.168 |
| MS3      | UPTR:Q9VWF0_DROME | RAS*AVAGPTK                          | 0.9178              | 0.272 |
| MS2      | HSP27_DROME       | RAS*GGPNALLPAVGK                     | 0.9971              | 0.292 |
| MS3      | HSP27_DROME       | RAS*GGPNALLPAVGK                     | 0.9983              | 0.298 |
| MS2      | UPTR:Q8IGS1_DROME | RAS*LGLPLQSSVPTPSTAEQQQQR            | 0.985               | 0.136 |
| MS3      | UPTR:Q8IGS1_DROME | RAS*LGLPLQSSVPTPSTAEQQQQR            | 0.9849              | 0.136 |
| MS2      | UPTR:Q7KNC5_DROME | RAS*QDVSSLSR                         | 0.9553              | 0.211 |
| MS2      | MCM2_DROME        | RDLGFGQS*DEDDVGPR                    | 0.9962              | 0.259 |
| MS3      | MCM2_DROME        | RDLGFGQS*DEDDVGPR                    | 0.9528              | 0.185 |
| MS2      | UPTR:Q86NR4_DROME | RDS*ESFQMPQLDEIEQAK                  | 0.9813              | 0.107 |
| MS3      | UPTR:Q86NR4_DROME | RDS*ESFQMPQLDEIEQAK                  | 0.98                | 0.107 |
| MS2      | UPTR:Q86LC4_DROME | RDS*FCEFLDAQGPR                      | 0.988               | 0.131 |
| MS3      | UPTR:Q86LC4_DROME | RDS*FCEFLDAQGPR                      | 0.989               | 0.236 |
| MS2      | UPTR:Q59E35_DROME | RDS*SVLPVAEQPPAK                     | 0.9832              | 0.065 |
| MS3      | UPTR:Q59E35_DROME | RDS*SVLPVAEQPPAK                     | 0.937               | 0.075 |
| MS2      | UPTR:Q9W002_DROME | RENS*DFFLAK                          | 0.9981              | 0.342 |
| MS3      | UPTR:Q9W002_DROME | RENS*DFFLAK                          | 0.9967              | 0.347 |
| MS2      | UPTR:Q95RK8_DROME | RES*VLGTIDEAMFAK                     | 0.9604              | 0.176 |
| MS3      | UPTR:Q95RK8_DROME | RES*VLGTIDEAMFAK                     | 0.9924              | 0.313 |
| MS2      | UPTR:Q86G33_DROSI | RES*WLHPNMLEK                        | 0.958               | 0.13  |
| MS2      | UPTR:Q9NHN6_DROME | RFS*DDIADQR                          | 0.9703              | 0.21  |
| MS2      | UPTR:Q9VY91_DROME | RFVS*EGDGGHVKPTTF                    | 0.9916              | 0.292 |
| MS3      | UPTR:Q9VY91_DROME | RFVS*EGDGGHVKPTTF                    | 0.9929              | 0.349 |
| MS2      | LASP1_DROME       | RIGS*VSDIDPANGIYGSLLTAAEQAHQQQK      | 0.9632              | 0.123 |
| MS3      | UPTR:Q9NFR7_DROME | RKPLVQQNS*LFVDPTNPLGLK               | 0.9625              | 0.273 |
| MS2      | UPTR:Q7YU91_DROME | RLS*ADELNVLLPTLNAPK                  | 1                   | 0.362 |
| MS3      | UPTR:Q7YU91_DROME | RLS*ADELNVLLPTLNAPK                  | 1                   | 0.407 |
| MS2      | UPTR:Q95RW5_DROME | RLS*NLLADNDVQPVFK                    | 0.9998              | 0.262 |
| MS3      | UPTR:Q95RW5_DROME | RLS*NLLADNDVQPVFK                    | 0.9992              | 0.214 |
| MS3      | UPTR:Q9V6Q6_DROME | RNS*FYLSNEESPLeVR                    | 0.9219              | 0.301 |

| MS Level | Protein           | Sequence                          | Peptide probability | dCn   |
|----------|-------------------|-----------------------------------|---------------------|-------|
| MS2      | UPTR:Q9I7D3_DROME | RNS*GNYQR                         | 0.9975              | 0.279 |
| MS3      | UPTR:Q9I7D3_DROME | RNS*GNYQR                         | 0.9944              | 0.353 |
| MS2      | UPTR:Q9VLK2_DROME | RPLILAPPES*PAAPAPAAK              | 0.9759              | 0.185 |
| MS3      | UPTR:Q8T9F1_DROME | RPLILAPPES*PAAPAPAAK              | 0.9963              | 0.173 |
| MS2      | UPTR:Q7KR73_DROME | RQDS*VELLNQTPVSVVISK              | 0.9988              | 0.298 |
| MS3      | UPTR:Q7KR73_DROME | RQDS*VELLNQTPVSVVISK              | 0.9994              | 0.368 |
| MS2      | UPTR:Q7KR73_DROME | RQDS*VELLNQTPVSVVISKPR            | 0.9597              | 0.369 |
| MS3      | UPTR:Q7KR73_DROME | RQDS*VELLNQTPVSVVISKPR            | 0.9419              | 0.358 |
| MS2      | GP:AE003493_34    | RQS*LELTPEQLER                    | 0.9965              | 0.212 |
| MS3      | GP:AE003493_34    | RQS*LELTPEQLER                    | 0.9993              | 0.355 |
| MS2      | UPTR:Q8T3Q6_DROME | RQS*LHVPSPELAAK                   | 0.9569              | 0.149 |
| MS3      | UPTR:Q8T3Q6_DROME | RQS*LHVPSPELAAK                   | 0.9321              | 0.207 |
| MS2      | HIRA_DROME        | RQS*LPFDPGQSNELLR                 | 0.9834              | 0.194 |
| MS3      | HIRA_DROME        | RQS*LPFDPGQSNELLR                 | 0.9866              | 0.194 |
| MS2      | UPTR:Q9NFR7_DROME | RQS*MEQLDLIK                      | 0.95                | 0.04  |
| MS3      | UPTR:Q9NFR7_DROME | RQS*MEQLDLIK                      | 0.9366              | 0.047 |
| MS3      | UPTR:Q961X5_DROME | RQVIVIMPS*LT*NAEYMLDIMAAT*LR      | 0.9463              | 0.25  |
| MS2      | UPTR:Q7KR73_DROME | RS*SQDGFQLSELSPVQQQLSEINNR        | 0.9591              | 0.016 |
| MS3      | UPTR:Q96936_DROME | RS*SQDGFQLSELSPVQQQLSEINNR        | 0.9269              | 0.016 |
| MS2      | UPTR:Q9VX75_DROME | RSS*DPNLLASLK                     | 0.998               | 0.201 |
| MS3      | UPTR:Q96782_DROME | RSS*DPNLLASLK                     | 0.9947              | 0.204 |
| MS2      | UPTR:Q96958_DROME | RSS*LPVGGPVLTR                    | 0.9985              | 0.262 |
| MS2      | UPTR:Q8WRQ7_DROME | RSS*NISALLEAAANEK                 | 0.9777              | 0.092 |
| MS3      | UPTR:Q8WRQ7_DROME | RSS*NISALLEAAANEK                 | 0.9896              | 0.074 |
| MS2      | UPTR:Q7KR73_DROME | RSS*QDGFQLSELSPVQQQLSEINNR        | 0.9377              | 0.131 |
| MS3      | UPTR:Q7KR73_DROME | RSS*QDGFQLSELSPVQQQLSEINNR        | 0.9537              | 0.138 |
| MS2      | HP1_DROME         | RT*TDAEQDTIPVSGSTGFDR             | 0.9971              | 0.001 |
| MS2      | UPTR:Q8IMS6_DROME | RTS*TTVLDSQAFK                    | 0.9922              | 0.046 |
| MS3      | UPTR:Q8IMS6_DROME | RTS*TTVLDSQAFK                    | 0.9718              | 0.087 |
| MS2      | UPTR:Q9W3W1_DROME | RTS*TVFGK                         | 0.966               | 0.135 |
| MS3      | UPTR:Q9W3W1_DROME | RTS*TVFGK                         | 0.9588              | 0.141 |
| MS3      | HP1_DROME         | RTT*TDAEQDTIPVSGSTGFDR            | 0.9573              | 0.002 |
| MS2      | GP:M14131_1       | RTTDAEQDT*IPVSGSTGFDR             | 0.9455              | 0.147 |
| MS3      | GP:M14131_1       | RTTDAEQDT*IPVSGSTGFDR             | 0.9565              | 0.147 |
| MS2      | UPTR:Q9GTU6_DROME | RVS*ELAGIPGGSAR                   | 0.9992              | 0.265 |
| MS3      | UPTR:Q9GTU6_DROME | RVS*ELAGIPGGSAR                   | 0.9421              | 0.373 |
| MS3      | UPTR:Q7K2Q3_DROME | RVS*PVPAK                         | 0.9953              | 0.2   |
| MS2      | UPTR:Q9W2U7_DROME | S*ASPAVVGSGSFR                    | 0.937               | 0.09  |
| MS2      | CDC37_DROME       | S*DDEDDTHPNIDTPSLFR               | 0.9045              | 0.235 |
| MS2      | UPTR:Q9Y162_DROME | S*DSDEDEDGDDPEK                   | 0.93                | 0.013 |
| MS3      | UPTR:Q9Y162_DROME | S*DSDEDEDGDDPEK                   | 0.9871              | 0.02  |
| MS2      | UPTR:Q9V426_DROME | S*EEEELEYDPALYPQR                 | 0.9968              | 0.289 |
| MS3      | UPTR:Q9V426_DROME | S*EEEELEYDPALYPQR                 | 0.9996              | 0.289 |
| MS2      | UPTR:Q9VAW4_DROME | S*FKSWSEEAAAAEAGESPVIGSVSLAQTGEK  | 0.9748              | 0.028 |
| MS3      | UPTR:Q9VAW4_DROME | S*FKSWSEEAAAAEAGESPVIGSVSLAQTGEK  | 0.9754              | 0.028 |
| MS2      | UPTR:Q5LK13_DROME | S*GEETDFDVADPAETSLLIK             | 0.9954              | 0.023 |
| MS3      | DBP80_DROME       | S*GEETDFDVADPAETSLLIK             | 0.995               | 0.024 |
| MS2      | UPTR:Q8IGG3_DROME | S*GSVSSFPDALDENNTSSGLNSPTDSLPK    | 0.9607              | 0.008 |
| MS3      | UPTR:Q8IGG3_DROME | S*GSVSSFPDALDENNTSSGLNSPTDSLPK    | 0.9458              | 0.013 |
| MS3      | UPTR:Q8MT43_DROME | S*IGCACGTFVLAGYLF                 | 0.9651              | 0.199 |
| MS2      | UPTR:Q8SY41_DROME | S*ILDSAIGFINDVTLANQPVDQPK         | 0.9522              | 0.076 |
| MS2      | UPTR:Q95TN8_DROME | S*LSDDEMPINHLLGPEANVANVVFSTPVSSQK | 0.9725              | 0.34  |
| MS3      | UPTR:Q95TN8_DROME | S*LSDDEMPINHLLGPEANVANVVFSTPVSSQK | 0.9635              | 0.317 |
| MS3      | PNUT_DROME        | S*NAVNGGSGGAIALPSTLAQLALR         | 0.9977              | 0.072 |
| MS2      | UPTR:Q7K765_DROME | S*NSQEQLDALQPQVK                  | 0.9351              | 0.017 |
| MS3      | UPTR:Q7K765_DROME | S*NSQEQLDALQPQVK                  | 0.9709              | 0.286 |
| MS3      | FUTSC_DROME       | S*PLDS*KDTS*RPGSMVESVTAEDEK       | 0.9272              | 0.223 |
| MS2      | UPTR:Q9NL57_DROME | S*RQSSVEQELLFSELDIQHNIQK          | 0.9423              | 0.021 |
| MS3      | UPTR:Q9NL57_DROME | S*RQSSVEQELLFSELDIQHNIQK          | 0.9697              | 0.032 |
| MS2      | UPTR:Q7KR74_DROME | S*SSNVNSQVGEAGSSVDADAPGR          | 0.9051              | 0.022 |
| MS3      | UPTR:Q7KR74_DROME | S*SSNVNSQVGEAGSSVDADAPGR          | 0.9983              | 0     |

| MS Level | Protein           | Sequence                                         | Peptide probability | dCn   |
|----------|-------------------|--------------------------------------------------|---------------------|-------|
| MS2      | CH18_DROSU        | S*SY                                             | 0.9966              | 0.077 |
| MS2      | UPTR:Q86S06_DROME | S*TSQQQQGVSSAVNATIDQLTK                          | 0.9085              | 0.007 |
| MS3      | UPTR:Q86S06_DROME | S*TSQQQQGVSSAVNATIDQLTK                          | 0.9364              | 0.038 |
| MS2      | UPTR:Q9Y095_DROME | S*VSPTPLDAKPLDR                                  | 0.9792              | 0.134 |
| MS2      | UPTR:Q9VXF9_DROME | SANRPVGGNPAISTLDFSNIAVPGTSSGGS*PPSR              | 0.9761              | 0.071 |
| MS3      | UPTR:Q9VXF9_DROME | SANRPVGGNPAISTLDFSNIAVPGTSSGGS*PPSR              | 0.9962              | 0.088 |
| MS2      | UPTR:Q8MR13_DROME | SAVSSPEQLPS*PTSPIAAEIGDKPYGR                     | 0.9894              | 0.19  |
| MS3      | UPTR:Q8MR13_DROME | SAVSSPEQLPS*PTSPIAAEIGDKPYGR                     | 0.9478              | 0.085 |
| MS2      | UPTR:Q86B44_DROME | SDLMLESGCELS*PR                                  | 0.9999              | 0.437 |
| MS3      | UPTR:Q86B44_DROME | SDLMLESGCELS*PR                                  | 0.9996              | 0.382 |
| MS2      | UPTR:Q9VQI0_DROME | SDLNLTGS*VELPVSPYFR                              | 0.9943              | 0.31  |
| MS3      | UPTR:Q9VQI0_DROME | SDLNLTGS*VELPVSPYFR                              | 0.9809              | 0.31  |
| MS2      | CAF1_DROME        | SDNAAES*FDDAVEER                                 | 0.967               | 0.168 |
| MS3      | CAF1_DROME        | SDNAAES*FDDAVEER                                 | 0.9113              | 0.157 |
| MS2      | UPTR:O46093_DROME | SDPLLGGDSVGVSP*PIR                               | 0.9976              | 0.291 |
| MS3      | UPTR:O46093_DROME | SDPLLGGDSVGVSP*PIR                               | 0.9889              | 0.243 |
| MS2      | UPTR:Q9Y162_DROME | SDS*DDEDGDDPEK                                   | 0.9939              | 0.254 |
| MS3      | UPTR:Q9Y162_DROME | SDS*DDEDGDDPEK                                   | 0.9718              | 0.274 |
| MS2      | H1_DROME          | SDSAVATSAS*PVAAPPATVEK                           | 0.9516              | 0.06  |
| MS3      | H1_DROME          | SDSAVATSAS*PVAAPPATVEK                           | 0.9578              | 0.06  |
| MS2      | MODU_DROME        | SEGADEVDES*DDDEEAPVEKPVSK                        | 0.98                | 0.223 |
| MS3      | MODU_DROME        | SEGADEVDES*DDDEEAPVEKPVSK                        | 0.9965              | 0.327 |
| MS3      | UPTR:Q7KRS5_DROME | SESAKEMLLS*QMPSLGPLPPS*PPNS*NPD                  | 0.9676              | 0.284 |
| MS2      | DNK_DROME         | SESSIFDAISSNQPPVLS*PSKR                          | 0.9832              | 0.112 |
| MS3      | DNK_DROME         | SESSIFDAISSNQPPVLS*PSKR                          | 0.988               | 0.113 |
| MS2      | UPTR:Q9VAW4_DROME | SFKS*WSEEA AAAE AAGESP I V G S V S L A Q T G E K | 0.9295              | 0.022 |
| MS3      | UPTR:Q9VAW4_DROME | SFKS*WSEEA AAAE AAGESP I V G S V S L A Q T G E K | 0.9175              | 0.022 |
| MS2      | UPTR:Q9VFE9_DROME | SFLPFDAADIPENDVS*LVSGR                           | 0.9986              | 0.242 |
| MS3      | UPTR:Q9VFE9_DROME | SFLPFDAADIPENDVS*LVSGR                           | 0.9986              | 0.242 |
| MS2      | DBP80_DROME       | SGEET*DFDVADPAETSLLIK                            | 0.9968              | 0.102 |
| MS3      | UPTR:Q5LK13_DROME | SGEET*DFDVADPAETSLLIK                            | 0.9963              | 0.104 |
| MS2      | UPTR:Q5LK13_DROME | SGEETDFDVADPAET*SLLIK                            | 0.9281              | 0.031 |
| MS3      | UPTR:Q5LK13_DROME | SGEETDFDVADPAET*SLLIK                            | 0.9221              | 0.031 |
| MS2      | UPTR:Q5LK13_DROME | SGEETDFDVADPAETS*LLIK                            | 0.9145              | 0.073 |
| MS3      | UPTR:Q5LK13_DROME | SGEETDFDVADPAETS*LLIK                            | 0.9954              | 0.064 |
| MS2      | UPTR:Q8IGG3_DROME | SGS*VSSFPDALDENNTSSGLNSPTDSLPK                   | 0.991               | 0.05  |
| MS3      | UPTR:Q8IGG3_DROME | SGS*VSSFPDALDENNTSSGLNSPTDSLPK                   | 0.9678              | 0.025 |
| MS2      | UPTR:Q8IGG3_DROME | SGSVS*SFPDALDENNTSSGLNSPTDSLPK                   | 0.9954              | 0.003 |
| MS3      | UPTR:Q8IGG3_DROME | SGSVS*SFPDALDENNTSSGLNSPTDSLPK                   | 0.985               | 0.001 |
| MS2      | UPTR:Q8IGG3_DROME | SGSVSS*FPDALDENNTSSGLNSPTDSLPK                   | 0.9575              | 0.015 |
| MS2      | UPTR:Q8IGZ9_DROME | SGSVSSASSVSSS*TENLK                              | 0.9965              | 0.073 |
| MS3      | UPTR:Q4VIW7_DROBU | SGSVSSASSVSSS*TENLK                              | 0.9988              | 0.047 |
| MS2      | UPTR:Q8IGG3_DROME | SGSVSSFPDALDENNTSSGLNS*PTDSLPK                   | 0.9216              | 0.028 |
| MS2      | UPTR:Q9VVA0_DROME | SHSPNASLQLPS*PIITR                               | 0.9822              | 0.203 |
| MS2      | UPTR:Q9NL57_DROME | SIS*AVDTAAAQR                                    | 0.9986              | 0.312 |
| MS3      | UPTR:Q9NL57_DROME | SIS*AVDTAAAQR                                    | 0.9995              | 0.263 |
| MS2      | UPTR:Q9VZL5_DROME | SIS*ECQVGGFVR                                    | 0.916               | 0.067 |
| MS2      | UPTR:Q7KQM6_DROME | SIS*TVATLSTDR                                    | 0.9714              | 0.099 |
| MS3      | UPTR:Q7KQM6_DROME | SIS*TVATLSTDR                                    | 0.9817              | 0.093 |
| MS2      | UPTR:Q8IGE9_DROME | SISLKEEDT*DVEQHQNNR                              | 0.9992              | 0.239 |
| MS3      | UPTR:Q8IGE9_DROME | SISLKEEDT*DVEQHQNNR                              | 0.9961              | 0.222 |
| MS2      | UPTR:Q9VP57_DROME | SLEES*PSADLLRPR                                  | 0.9091              | 0.084 |
| MS2      | UPTR:Q8MRY4_DROME | SLES*DEDDILEK                                    | 0.9871              | 0.161 |
| MS3      | UPTR:Q8MRY4_DROME | SLES*DEDDILEK                                    | 0.9772              | 0.118 |
| MS2      | UPTR:Q9XZ07_DROME | SLQEGEGDLS*IAEDR                                 | 1                   | 0.444 |
| MS3      | UPTR:Q9XZ07_DROME | SLQEGEGDLS*IAEDR                                 | 0.9915              | 0.391 |
| MS2      | UPTR:Q95TN8_DROME | SLS*DDEMPINHLLGPEANVANVVFSTPVSSQK                | 0.9856              | 0.041 |
| MS3      | UPTR:Q95TN8_DROME | SLS*DDEMPINHLLGPEANVANVVFSTPVSSQK                | 0.9922              | 0.042 |
| MS2      | UPTR:Q8T3Q6_DROME | SLS*GAPEDLEEMEIK                                 | 0.9439              | 0.085 |
| MS3      | UPTR:Q8T3Q6_DROME | SLS*GAPEDLEEMEIK                                 | 0.952               | 0.085 |
| MS2      | UPTR:Q8MSB4_DROME | SLS*PVSLILEMEK                                   | 0.9708              | 0.052 |

| MS Level | Protein           | Sequence                             | Peptide probability | dCn   |
|----------|-------------------|--------------------------------------|---------------------|-------|
| MS3      | UPTR:Q8MSB4_DROME | SLS*PVSLILEMEK                       | 0.9717              | 0.053 |
| MS3      | UPTR:Q9VMA0_DROME | SLVELSFYLSSNHADNIKNCT*L              | 0.9857              | 0.258 |
| MS2      | PNUT_DROME        | SNAVNGGS*GGAISALPSTLAQLALR           | 0.9841              | 0.085 |
| MS3      | PNUT_DROME        | SNAVNGGS*GGAISALPSTLAQLALR           | 0.9845              | 0.085 |
| MS3      | UPTR:Q9VWS2_DROME | SNISFATSPGGSS*PHELNR                 | 0.9051              | 0.016 |
| MS2      | UPTR:Q7K764_DROME | SNS*LEELR                            | 0.9856              | 0.167 |
| MS3      | UPTR:Q7K764_DROME | SNS*LEELR                            | 0.9492              | 0.136 |
| MS2      | UPTR:Q8MQI1_DROME | SPLS*ADMSLGLAK                       | 0.9916              | 0.407 |
| MS3      | UPTR:Q8MQI1_DROME | SPLS*ADMSLGLAK                       | 0.9651              | 0.333 |
| MS2      | UPTR:O16048_DROME | SQS*SENILNEK                         | 0.9951              | 0.11  |
| MS3      | UPTR:O16048_DROME | SQS*SENILNEK                         | 0.9953              | 0.109 |
| MS2      | UPTR:Q9NL57_DROME | SRQS*SVEQELLFSSELDIQHNIQK            | 0.9317              | 0.015 |
| MS3      | UPTR:Q9NL57_DROME | SRQS*SVEQELLFSSELDIQHNIQK            | 0.915               | 0.016 |
| MS2      | UPTR:Q8T3W9_DROME | SS*GLTIDTNPDPAGGFR                   | 0.956               | 0.117 |
| MS2      | UPTR:Q8IGZ9_DROME | SS*IPFGQNTAEVAAQK                    | 0.9804              | 0.002 |
| MS2      | UPTR:Q94885_DROME | SS*LQFQEQQQPEQSK                     | 0.9627              | 0.002 |
| MS3      | UPTR:Q94885_DROME | SS*LQFQEQQQPEQSK                     | 0.955               | 0.002 |
| MS2      | UPTR:Q7KR74_DROME | SS*SNVNSQVGEAGSSVDADAPGR             | 0.9404              | 0.004 |
| MS3      | UPTR:Q7KR74_DROME | SS*SNVNSQVGEAGSSVDADAPGR             | 0.9401              | 0.004 |
| MS2      | GP:AE003526_24    | SS*TTLVYSSEPR                        | 0.971               | 0.01  |
| MS3      | LASP1_DROME       | SS*TTLVYSSEPR                        | 0.9855              | 0.008 |
| MS2      | UPTR:Q6AWQ1_DROME | SS*VEYAGPAVNTIDLRC                   | 0.9942              | 0.005 |
| MS3      | UPTR:Q6AWQ1_DROME | SS*VEYAGPAVNTIDLRC                   | 0.9791              | 0.005 |
| MS2      | UPTR:Q8INM3_DROME | SSIS*ETELER                          | 0.98                | 0.149 |
| MS2      | UPTR:Q7KR73_DROME | SSS*IPALTFGFGFKPIR                   | 0.9716              | 0.151 |
| MS3      | UPTR:Q7KR73_DROME | SSS*IPALTFGFGFKPIR                   | 0.9795              | 0.142 |
| MS2      | UPTR:Q7KR74_DROME | SSS*NVNSQVGEAGSSVDADAPGR             | 0.9961              | 0     |
| MS3      | UPTR:Q7KR74_DROME | SSS*NVNSQVGEAGSSVDADAPGR             | 0.9959              | 0     |
| MS2      | UPTR:Q8MME2_DROME | SSS*SENVNEPTLK                       | 0.9591              | 0.035 |
| MS3      | UPTR:Q8IQN4_DROME | SSSAATTPAALES*PVR                    | 0.9572              | 0.29  |
| MS3      | UPTR:Q4TZM6_DROME | SSSAGPS*VT*GLTVAGSGGDGNANATGGGDAS*DK | 0.9824              | 0.161 |
| MS2      | CPD1_DROME        | SSTAAVA AIS*PGIK                     | 0.9992              | 0.281 |
| MS3      | GP:U56393_1       | SSTAAVA AIS*PGIK                     | 0.9989              | 0.365 |
| MS2      | UPTR:Q9VA36_DROME | SSTS*SATTSSATTVATGLTSSSVSK           | 0.9989              | 0.004 |
| MS3      | UPTR:Q9VA36_DROME | SSTS*SATTSSATTVATGLTSSSVSK           | 0.9983              | 0.005 |
| MS2      | UPTR:Q86S06_DROME | ST*SQQQQGVSSAVNATIDQLTK              | 0.9441              | 0.001 |
| MS3      | UPTR:Q86S06_DROME | ST*SQQQQGVSSAVNATIDQLTK              | 0.976               | 0.025 |
| MS2      | UPTR:Q8T3Q6_DROME | STS*FMDQMMSGAK                       | 0.9418              | 0.074 |
| MS3      | UPTR:Q8T3Q6_DROME | STS*FMDQMMSGAK                       | 0.9744              | 0.107 |
| MS2      | UPTR:Q86S06_DROME | STS*QQQQGVSSAVNATIDQLTK              | 0.978               | 0.036 |
| MS3      | UPTR:Q86S06_DROME | STS*QQQQGVSSAVNATIDQLTK              | 0.9605              | 0.014 |
| MS2      | UPTR:P91675_DROME | SVAMLMASPS*EEQSVATSTTEPAIISDAR       | 0.914               | 0.016 |
| MS3      | UPTR:P91675_DROME | SVAMLMASPS*EEQSVATSTTEPAIISDAR       | 0.9113              | 0.014 |
| MS2      | UPTR:P91675_DROME | SVAMLMASPS*EEQSVATSTTEPAIISDAR       | 0.9338              | 0.023 |
| MS2      | UPTR:Q9I7T7_DROME | SVATSTS*TENLSAAATASK                 | 0.9984              | 0.043 |
| MS3      | UPTR:Q9I7T7_DROME | SVATSTS*TENLSAAATASK                 | 0.9988              | 0.044 |
| MS2      | UPTR:Q9VGE4_DROME | SVS*QVEDEEAEMAAR                     | 0.9736              | 0.033 |
| MS3      | UPTR:Q9VGE4_DROME | SVS*QVEDEEAEMAAR                     | 0.9093              | 0.037 |
| MS2      | UPTR:O16040_DROME | T*ADSPAKEPQEICEVK                    | 0.9371              | 0.042 |
| MS2      | UPTR:Q24452_DROME | T*ASAAAAMMSLTAAAAPK                  | 0.962               | 0.014 |
| MS3      | UPTR:Q9VZZ9_DROME | T*ASAAAAMMSLTAAAAPK                  | 0.9195              | 0.014 |
| MS2      | UPTR:Q8MZH3_DROME | T*KSETEDPIELLK                       | 0.9811              | 0.045 |
| MS3      | UPTR:Q8MZH3_DROME | T*KSETEDPIELLK                       | 0.9264              | 0.05  |
| MS2      | UPTR:Q5KTT4_DROME | T*LLNTSPNLLPITTATDTFNLLK             | 0.9139              | 0.021 |
| MS3      | UPTR:Q5KTT4_DROME | T*LLNTSPNLLPITTATDTFNLLK             | 0.9033              | 0.021 |
| MS3      | UPTR:Q9N618_DROSI | T*S*NVFAMFDQAQIAEFK                  | 0.9445              | 0.274 |
| MS2      | UPTR:Q9W4L2_DROME | T*SPIQVNGAALACPLVR                   | 0.9845              | 0.015 |
| MS3      | UPTR:Q9W4L2_DROME | T*SPIQVNGAALACPLVR                   | 0.9933              | 0.024 |
| MS3      | HP1_DROME         | T*TDAEQDTIPVSGSTGFDR                 | 0.9562              | 0.004 |
| MS2      | GP:AY071367_1     | T*VGT*FIT*RQPQLLVLDPALAHEILVD        | 0.9612              | 0.308 |
| MS3      | CP391_DROME       | T*VGT*FIT*RQPQLLVLDPALAHEILVD        | 1                   | 0.33  |

| MS Level | Protein           | Sequence                            | Peptide probability | dCn   |
|----------|-------------------|-------------------------------------|---------------------|-------|
| MS2      | UPTR:O16040_DROME | TADS*PAKEPQEICEVK                   | 0.9426              | 0.07  |
| MS3      | UPTR:O16040_DROME | TADS*PAKEPQEICEVK                   | 0.9234              | 0.091 |
| MS2      | UPTR:Q8IRB9_DROME | TANLMSTS*LIVTSSSSR                  | 0.9948              | 0.106 |
| MS3      | UPTR:Q8IRB9_DROME | TANLMSTS*LIVTSSSSR                  | 0.9956              | 0.095 |
| MS2      | UPTR:Q8IGG3_DROME | TASVFGS*ITSGISSK                    | 0.9985              | 0.149 |
| MS3      | UPTR:Q8IGG3_DROME | TASVFGS*ITSGISSK                    | 0.9984              | 0.143 |
| MS2      | UPTR:P91675_DROME | TATVGADS*DEEDIEPPQPDAGDLTR          | 0.9742              | 0.001 |
| MS3      | UPTR:P91675_DROME | TATVGADS*DEEDIEPPQPDAGDLTR          | 0.9387              | 0.001 |
| MS2      | UPTR:Q8MLI7_DROME | TDNQKS*PLFTTSATTGPHVEST             | 0.9196              | 0.144 |
| MS3      | 41_DROME          | TDNQKS*PLFTTSATTGPHVEST             | 0.9068              | 0.136 |
| MS2      | PPAN_DROME        | TDS*DPEDDAEYKKEEVGEEPDEELFK         | 0.9522              | 0.071 |
| MS3      | PPAN_DROME        | TDS*DPEDDAEYKKEEVGEEPDEELFK         | 0.9387              | 0.076 |
| MS2      | GP:U01842_1       | TEQVLTQQAQEILAAADLATDDTHQLHGT*IER   | 0.9488              | 0.053 |
| MS3      | GP:U01842_1       | TEQVLTQQAQEILAAADLATDDTHQLHGT*IER   | 0.9073              | 0.053 |
| MS2      | UPTR:O96046_DROME | TGGIGNAISAFNQMQS*PVSETPPAR          | 0.9916              | 0.098 |
| MS3      | UPTR:O96046_DROME | TGGIGNAISAFNQMQS*PVSETPPAR          | 0.9889              | 0.086 |
| MS2      | BICD_DROME        | TGIEQEDALLNES*AAR                   | 0.9998              | 0.291 |
| MS3      | BICD_DROME        | TGIEQEDALLNES*AAR                   | 0.9994              | 0.382 |
| MS3      | UPTR:Q9VQK3_DROME | TGVCEGDIFSIGGGPGGNFS*L              | 0.9995              | 0.308 |
| MS2      | UPTR:Q8ML45_DROME | TIS*GTQTVATAVGNLATISQQQPQQSPLGK     | 0.9806              | 0.024 |
| MS3      | UPTR:O17142_DROME | TIS*GTQTVATAVGNLATISQQQPQQSPLGK     | 0.9857              | 0.009 |
| MS2      | UPTR:O17142_DROME | TISGT*QTVATAVGNLATISQQQPQQSPLGK     | 0.9536              | 0.051 |
| MS3      | UPTR:Q8ML45_DROME | TISGT*QTVATAVGNLATISQQQPQQSPLGK     | 0.9623              | 0.061 |
| MS2      | UPTR:Q9VNA2_DROME | TIVPTHFSES*PPR                      | 0.9966              | 0.297 |
| MS3      | UPTR:Q9VNA2_DROME | TIVPTHFSES*PPR                      | 0.924               | 0.151 |
| MS2      | UPTR:Q8MZH3_DROME | TKS*ETEDPIELK                       | 0.9526              | 0.026 |
| MS2      | GNL3_DROME        | TLES*MVEDADMR                       | 0.9986              | 0.178 |
| MS3      | GNL3_DROME        | TLES*MVEDADMR                       | 0.9988              | 0.178 |
| MS2      | UPTR:Q5KTT4_DROME | TLLNT*SPNLLPITTATDTFNLLK            | 0.9319              | 0.039 |
| MS3      | UPTR:Q5KTT4_DROME | TLLNT*SPNLLPITTATDTFNLLK            | 0.9734              | 0.012 |
| MS2      | UPTR:Q5KTT4_DROME | TLLNTS*PNLLPITTATDTFNLLK            | 0.9917              | 0.002 |
| MS3      | UPTR:Q5KTT4_DROME | TLLNTS*PNLLPITTATDTFNLLK            | 0.999               | 0.328 |
| MS2      | UPTR:Q6UBD8_DROME | TLS*DIGSITEFPEPDVER                 | 0.9575              | 0.015 |
| MS3      | UPTR:Q6UBD8_DROME | TLS*DIGSITEFPEPDVER                 | 0.9668              | 0.015 |
| MS2      | GP:U01842_1       | TLVATS*PHQEIVR                      | 0.9841              | 0.013 |
| MS3      | GP:U01842_1       | TLVATS*PHQEIVR                      | 0.9829              | 0.012 |
| MS2      | UPTR:Q24496_DROME | TPFASTPNDS*PDVILK                   | 1                   | 0.226 |
| MS3      | UPTR:Q24496_DROME | TPFASTPNDS*PDVILK                   | 0.999               | 0.229 |
| MS2      | UPTR:Q95R63_DROME | TQDS*DEFNLEGPFSK                    | 0.9995              | 0.129 |
| MS3      | UPTR:Q95R63_DROME | TQDS*DEFNLEGPFSK                    | 0.9988              | 0.177 |
| MS2      | UPTR:Q8I1D4_DROVI | TQFFGLDNLPS*PTADR                   | 0.9767              | 0.414 |
| MS3      | UPTR:Q8I1D4_DROVI | TQFFGLDNLPS*PTADR                   | 0.9793              | 0.001 |
| MS2      | UPTR:Q8I1J2_DROER | TQFFGLDNLPS*PTADR                   | 0.9917              | 0.02  |
| MS2      | UPTR:Q8I1D4_DROVI | TQFFGLDNLPS*PTADR                   | 0.9984              | 0.055 |
| MS3      | UPTR:Q8I1D4_DROVI | TQFFGLDNLPS*PTADR                   | 0.9929              | 0.055 |
| MS2      | EAS_DROME         | TQGLS*PVQSEDVPIIEKEDDDEFTDDR        | 0.9386              | 0.15  |
| MS3      | EAS_DROME         | TQGLS*PVQSEDVPIIEKEDDDEFTDDR        | 0.9618              | 0.147 |
| MS2      | EF1D_DROME        | TQVS*LLNELLTATVK                    | 0.9941              | 0.098 |
| MS3      | EF1D_DROME        | TQVS*LLNELLTATVK                    | 0.9933              | 0.098 |
| MS2      | UPTR:Q6NP13_DROME | TRQS*EDLLVER                        | 0.9573              | 0.188 |
| MS3      | UPTR:Q6NP13_DROME | TRQS*EDLLVER                        | 0.9894              | 0.12  |
| MS2      | UPTR:Q23980_DROME | TS*GAQVLDGTATPQMAFLQR               | 0.9941              | 0.001 |
| MS3      | UPTR:Q23980_DROME | TS*GAQVLDGTATPQMAFLQR               | 0.9782              | 0.001 |
| MS2      | UPTR:Q9W4L2_DROME | TS*PIQVNGAALACPLVR                  | 0.9515              | 0.004 |
| MS3      | UPTR:Q9W4L2_DROME | TS*PIQVNGAALACPLVR                  | 0.9567              | 0.004 |
| MS2      | UPTR:Q9VHU6_DROME | TS*SGDDAPLLTAK                      | 0.9172              | 0.005 |
| MS2      | UPTR:Q9VDI1_DROME | TSAAVAGAATATAAATAASAAS*NRNSSVTNGNGK | 0.9919              | 0.09  |
| MS3      | UPTR:Q9VDI1_DROME | TSAAVAGAATATAAATAASAAS*NRNSSVTNGNGK | 0.9911              | 0.09  |
| MS2      | UPTR:Q9VWY7_DROME | TSAIPVRLS*PPVPGGGLPAPATCEVEQALNR    | 0.9799              | 0.084 |
| MS3      | UPTR:Q9VWY7_DROME | TSAIPVRLS*PPVPGGGLPAPATCEVEQALNR    | 0.9808              | 0.084 |
| MS2      | UPTR:Q9XYZ7_DROME | TSLFSCADSKDS*PK                     | 0.9938              | 0.164 |



| MS Level | Protein           | Sequence                          | Peptide probability | dCn   |
|----------|-------------------|-----------------------------------|---------------------|-------|
| MS3      | UPTR:Q9XYZ7_DROME | TSLFSCADSKDS*PK                   | 0.9898              | 0.159 |
| MS2      | UPTR:Q9VYB2_DROME | TSRPLS*PMPDFTDSLQR                | 0.9165              | 0.062 |
| MS2      | UPTR:Q9VHU6_DROME | TSS*GDDDAPLLTAK                   | 0.9425              | 0.068 |
| MS3      | UPTR:Q9VHU6_DROME | TSS*GDDDAPLLTAK                   | 0.9363              | 0.081 |
| MS2      | UPTR:Q7KV88_DROME | TSS*VLPDLLSQASPATPPR              | 0.9503              | 0.01  |
| MS3      | UPTR:Q7KV88_DROME | TSS*VLPDLLSQASPATPPR              | 0.9666              | 0.016 |
| MS2      | UPTR:Q8IMS6_DROME | TSTISNPNSARPS*FNVEDDVDQALS        | 0.9458              | 0.294 |
| MS3      | UPTR:Q8IMS6_DROME | TSTISNPNSARPS*FNVEDDVDQALS        | 0.9966              | 0.136 |
| MS3      | UPTR:Q9UB07_DROME | TSTS*PSPVLNALR                    | 0.9415              | 0.08  |
| MS3      | HP1_DROME         | TT*DAEQDTIPVSGSTGFDR              | 0.9768              | 0.002 |
| MS2      | UPTR:Q8MQK4_DROME | TT*SIGNQTTTANPSECIIR              | 0.9329              | 0.005 |
| MS2      | UPTR:Q7KRU0_DROME | TT*SVSVGVPEHIVK                   | 0.9445              | 0.012 |
| MS3      | UPTR:Q7KRU0_DROME | TT*SVSVGVPEHIVK                   | 0.9366              | 0.058 |
| MS3      | UPTR:Q6NLK4_DROME | TTGETS*PQAEKEDS*ANEQSADPAVAEEDESK | 0.9036              | 0.023 |
| MS2      | UPTR:Q6NLK4_DROME | TTGETS*PQAEKEDSANEQSADPAVAEEDESK  | 0.9539              | 0.04  |
| MS3      | UPTR:Q6NLK4_DROME | TTGETS*PQAEKEDSANEQSADPAVAEEDESK  | 0.9108              | 0.042 |
| MS2      | UPTR:Q6NLK4_DROME | TTGETSPQAEKEDS*ANEQSADPAVAEEDESK  | 0.9184              | 0.111 |
| MS3      | UPTR:Q6NLK4_DROME | TTGETSPQAEKEDS*ANEQSADPAVAEEDESK  | 0.9433              | 0.09  |
| MS2      | UPTR:Q8IGE9_DROME | TTKS*EGDQSGVEAGAK                 | 0.9653              | 0.194 |
| MS3      | UPTR:Q8IGE9_DROME | TTKS*EGDQSGVEAGAK                 | 0.9957              | 0.2   |
| MS2      | UPTR:Q8MQK4_DROME | TTS*IGNQTTTANPSECIIR              | 0.9321              | 0.034 |
| MS2      | UPTR:Q8IGE9_DROME | TTS*QTDNEQPQGETAQK                | 0.9873              | 0.007 |
| MS3      | UPTR:Q8IGE9_DROME | TTS*QTDNEQPQGETAQK                | 0.9894              | 0.069 |
| MS2      | UPTR:Q7KRU0_DROME | TTS*VSVGVPEHIVK                   | 0.927               | 0.04  |
| MS3      | UPTR:Q7KRU0_DROME | TTS*VSVGVPEHIVK                   | 0.9271              | 0.077 |
| MS2      | UPTR:Q8T0P5_DROME | TTVSNAGIVGGLGFMS*PR               | 0.976               | 0.232 |
| MS3      | UPTR:Q8IGQ1_DROME | TTVSNAGIVGGLGFMS*PR               | 0.9989              | 0.254 |
| MS2      | UPTR:Q8MPP2_DROME | TVQDTS*EVGVVTK                    | 0.9502              | 0.21  |
| MS3      | UPTR:Q8MPP2_DROME | TVQDTS*EVGVVTK                    | 0.9538              | 0.187 |
| MS2      | UPTR:Q6XHQ8_DROYA | VAADDVS*AVKDDLK                   | 0.9943              | 0.281 |
| MS3      | UPTR:Q6XHQ8_DROYA | VAADDVS*AVKDDLK                   | 0.9903              | 0.289 |
| MS3      | UPTR:Q8IRH5_DROME | VAEIEEPSTQES*DKK                  | 0.9577              | 0.173 |
| MS2      | GP:AE003417_4     | VAIVSTGSELCS*PR                   | 0.9861              | 0.315 |
| MS3      | GP:AE003417_4     | VAIVSTGSELCS*PR                   | 0.9879              | 0.315 |
| MS3      | UPTR:Q8MR14_DROME | VALQIGNTT*ITPLTK                  | 0.9049              | 0.045 |
| MS2      | UPTR:Q9VNE0_DROME | VEIFDNLFSSS*PISNIR                | 0.9152              | 0.008 |
| MS3      | UPTR:Q9VNE0_DROME | VEIFDNLFSSS*PISNIR                | 0.9524              | 0.066 |
| MS2      | UPTR:Q86BS3_DROME | VENSEAPAPVS*PAPVPQK               | 0.9992              | 0.4   |
| MS3      | UPTR:Q86BS3_DROME | VENSEAPAPVS*PAPVPQK               | 0.9992              | 0.4   |
| MS2      | UPTR:Q9W0N9_DROME | VEPEAELES*ELDQDPADLDEDANNGR       | 0.999               | 0.389 |
| MS3      | UPTR:Q9W0N9_DROME | VEPEAELES*ELDQDPADLDEDANNGR       | 0.9989              | 0.33  |
| MS2      | UPTR:O46307_DROME | VEPEDDS*DEELVR                    | 0.9985              | 0.21  |
| MS3      | UPTR:Q8MR29_DROME | VEPEDDS*DEELVR                    | 0.9986              | 0.274 |
| MS2      | UPTR:Q960P4_DROME | VEPMSVDSEEKTS*PVK                 | 0.9472              | 0.238 |
| MS3      | UPTR:Q960P4_DROME | VEPMSVDSEEKTS*PVK                 | 0.9492              | 0.061 |
| MS2      | GP:AE003707_12    | VES*GADLKDYFDR                    | 0.9882              | 0.19  |
| MS3      | GP:AE003707_12    | VES*GADLKDYFDR                    | 0.9539              | 0.214 |
| MS2      | UPTR:Q8T3Q6_DROME | VEVGNDFCPSQS*FVDMVAEK             | 0.9982              | 0.231 |
| MS3      | UPTR:Q8T3Q6_DROME | VEVGNDFCPSQS*FVDMVAEK             | 0.9979              | 0.23  |
| MS2      | UPTR:Q8IRM8_DROME | VFGS*SIKVDLAK                     | 0.9216              | 0.086 |
| MS2      | UPTR:Q9V6S4_DROME | VFGSLKPSNQGDS*DGE                 | 0.973               | 0.143 |
| MS3      | UPTR:Q9V6S4_DROME | VFGSLKPSNQGDS*DGE                 | 0.9327              | 0.146 |
| MS2      | UPTR:Q9VM93_DROME | VGS*LEHVNLLAR                     | 0.9861              | 0.169 |
| MS3      | UPTR:Q9VM93_DROME | VGS*LEHVNLLAR                     | 0.9953              | 0.29  |
| MS2      | UPTR:Q9VA36_DROME | VGVFPSNFVQHIEPS*PVLASK            | 0.9758              | 0.036 |
| MS3      | UPTR:Q7YU85_DROME | VGVFPSNFVQHIEPS*PVLASK            | 0.9033              | 0.068 |
| MS2      | UPTR:Q7YU85_DROME | VGVFPSNFVQHIEPS*PVLASK            | 0.9109              | 0.256 |
| MS3      | UPTR:Q9VA36_DROME | VGVFPSNFVQHIEPS*PVLASK            | 0.9394              | 0.015 |
| MS2      | UPTR:Q8IGK0_DROME | VIQGLEDNEDS*QGEAPNLK              | 1                   | 0.496 |
| MS3      | UPTR:Q8IGK0_DROME | VIQGLEDNEDS*QGEAPNLK              | 1                   | 0.481 |
| MS2      | UPTR:O76755_DROME | VIS*AGVSAVLSEPEKPGGDNFLR          | 0.9732              | 0.398 |

| MS Level | Protein           | Sequence                            | Peptide probability | dCn   |
|----------|-------------------|-------------------------------------|---------------------|-------|
| MS3      | UPTR:O76755_DROME | VIS*AGVSAVLSEPEKPGGDNFLR            | 0.9186              | 0.337 |
| MS2      | UPTR:Q9VWS3_DROME | VIS*EDEDEFVFDNLSHKS*S*GSSLNIQR      | 0.9489              | 0.32  |
| MS2      | UPTR:Q86B47_DROME | VLDEEDEQEKGDS*DDGDIPLLQGLR          | 0.9826              | 0.16  |
| MS3      | UPTR:Q86B47_DROME | VLDEEDEQEKGDS*DDGDIPLLQGLR          | 0.9831              | 0.16  |
| MS2      | UPTR:Q9VYV4_DROME | VLDGDDT*NDGVGVLDLDES*QGAGGR         | 0.9982              | 0.189 |
| MS3      | UPTR:Q9VYV4_DROME | VLDGDDT*NDGVGVLDLDES*QGAGGR         | 0.9971              | 0.189 |
| MS2      | UPTR:Q8IGC9_DROME | VLRPPGGGS*SDIFGSEMPQTPR             | 0.9239              | 0.36  |
| MS2      | UPTR:Q8IGC9_DROME | VLRPPGGSSDIFGSEMPQTPR               | 0.9912              | 0.149 |
| MS2      | UPTR:Q8IRB5_DROME | VLS*DDESEENQNEK                     | 1                   | 0.354 |
| MS3      | UPTR:Q8IRB5_DROME | VLS*DDESEENQNEK                     | 1                   | 0.408 |
| MS2      | UPTR:Q9VTU0_DROME | VMNKEDDS*EDEEFGGIFK                 | 0.964               | 0.243 |
| MS3      | UPTR:Q9VTU0_DROME | VMNKEDDS*EDEEFGGIFK                 | 0.9739              | 0.362 |
| MS2      | UPTR:Q9XZ31_DROME | VNFS*PILATELGPR                     | 0.9664              | 0.195 |
| MS3      | UPTR:Q9XZ31_DROME | VNFS*PILATELGPR                     | 0.995               | 0.174 |
| MS3      | UPTR:Q7KVC1_DROME | VNS*RDLVVT*AAR                      | 0.9406              | 0.157 |
| MS2      | MODU_DROME        | VQEEETVVPQS*PSK                     | 0.9571              | 0.203 |
| MS3      | MODU_DROME        | VQEEETVVPQS*PSK                     | 0.9125              | 0.203 |
| MS2      | MODU_DROME        | VQEEETVVPQSPS*K                     | 0.9294              | 0.246 |
| MS3      | MODU_DROME        | VQEEETVVPQSPS*K                     | 0.9398              | 0.246 |
| MS2      | UPTR:Q7KQ11_DROME | VQS*MVGIIGNR                        | 0.9597              | 0.135 |
| MS3      | UPTR:Q7KQ11_DROME | VQS*MVGIIGNR                        | 0.9656              | 0.093 |
| MS2      | UPTR:Q8MQX4_DROME | VRDFS*PVIGQNVGR                     | 0.9349              | 0.126 |
| MS2      | HP1_DROME         | VS*DAEEEEEEYAVEK                    | 0.9762              | 0.154 |
| MS3      | HP1_DROME         | VS*DAEEEEEEYAVEK                    | 0.9763              | 0.179 |
| MS2      | UPTR:Q76NQ9_DROME | VS*ISGEDTSGVPLEDLER                 | 0.9937              | 0.187 |
| MS3      | UPTR:Q76NQ9_DROME | VS*ISGEDTSGVPLEDLER                 | 0.9879              | 0.164 |
| MS3      | UPTR:Q9V9I8_DROME | VS*TVYVMPGHQSSISPMDNLDRLER          | 0.9721              | 0.264 |
| MS2      | UPTR:Q9V544_DROME | VSVLDEDLDELPS*DEEK                  | 0.9954              | 0.283 |
| MS3      | UPTR:Q9V544_DROME | VSVLDEDLDELPS*DEEK                  | 0.9966              | 0.283 |
| MS2      | UPTR:Q9V544_DROME | VSVLDEDLDELPS*DEEKADETNRPK          | 0.9436              | 0.145 |
| MS3      | UPTR:Q9V544_DROME | VSVLDEDLDELPS*DEEKADETNRPK          | 0.9886              | 0.242 |
| MS2      | UPTR:Q24050_DROME | VTPLDGGLPAGAS*PK                    | 1                   | 0.364 |
| MS3      | UPTR:Q24050_DROME | VTPLDGGLPAGAS*PK                    | 0.9998              | 0.364 |
| MS2      | UPTR:Q9VUB8_DROME | VTTGEAIPT*PETVPAR                   | 0.9553              | 0.24  |
| MS3      | UPTR:Q9VUB8_DROME | VTTGEAIPT*PETVPAR                   | 0.9616              | 0.24  |
| MS2      | GP:L14644_1       | VVLMETDDS*LPSTSK                    | 0.9989              | 0.35  |
| MS3      | HYD_DROME         | VVLMETDDS*LPSTSK                    | 0.999               | 0.373 |
| MS3      | UPTR:Q9V5J7_DROME | VYTHVSRQLQFDSENGLHVNT*FEGLNYWDQLSVK | 0.9624              | 0.195 |
| MS2      | UPTR:Q9VVA0_DROME | WEEPFYGGSS*PAK                      | 0.9846              | 0.264 |
| MS3      | UPTR:Q9VVA0_DROME | WEEPFYGGSS*PAK                      | 0.9763              | 0.033 |
| MS2      | YC17_DROME        | WRDES*DDEEGDQK                      | 0.964               | 0.216 |
| MS3      | YC17_DROME        | WRDES*DDEEGDQK                      | 0.9895              | 0.257 |
| MS2      | UPTR:Q9VB23_DROME | YRNS*QDVELQLPLPK                    | 0.9964              | 0.162 |
| MS3      | UPTR:Q9VB23_DROME | YRNS*QDVELQLPLPK                    | 0.9794              | 0.186 |
| MS2      | UPTR:Q95TU6_DROME | YS*ISNAEFDIEDVVQR                   | 0.9827              | 0.05  |
| MS3      | UPTR:Q95TU6_DROME | YS*ISNAEFDIEDVVQR                   | 0.9449              | 0.052 |
